# Supplementary material for: Pak1 pathway hyper-activation mediates resistance to endocrine therapy and CDK4/6 inhibitors in ER+ breast cancer
Source: PubMed Central journal article supplement (PMC10232479; doi:10.1038/s41523-023-00556-9), 2023-05-31

# Supplementary Figure 1. Sensitivity of MCF-7-FAR and T47D-FAR cells to single drugs

**a**

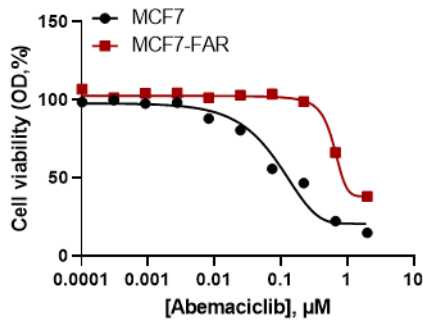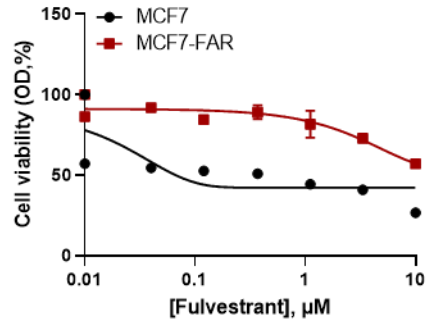

**b**

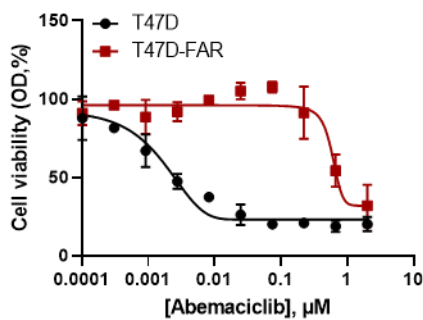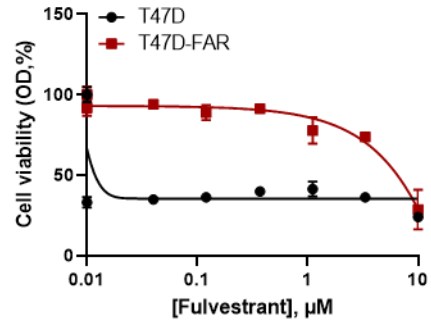

**c**

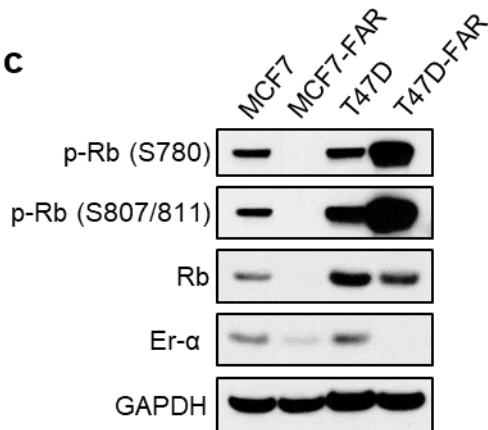

**Supplementary Figure 1.** Dose-response curves of MCF7, MCF7-FAR (**a**), T47D, T47D-FAR (**b**) exposed to increasing doses of fulvestrant or abemaciclib up to 10  $\mu\text{M}$  or 2.5  $\mu\text{M}$  concentrations, respectively, every 72 hours for 1 week, and then stained with crystal violet solution. Each data point represents the percent of cell viability relative to vehicle-treated controls, and shown as mean  $\pm$  SD from three independent experiments. Western blot for p-Rb (S780), p-Rb (S807/811), Rb, Er- $\alpha$  in MCF7, T47D parental and -FAR cells, treated with fulvestrant (1 $\mu\text{M}$ ) and abemaciclib (0.25 $\mu\text{M}$ ) for 18 hours. GAPDH was used as a loading control. Images are representatives from three independent experiments (**c**).

## Supplementary Figure 2. Analysis of cytoskeleton rearrangement and migratory capability of FAR cells

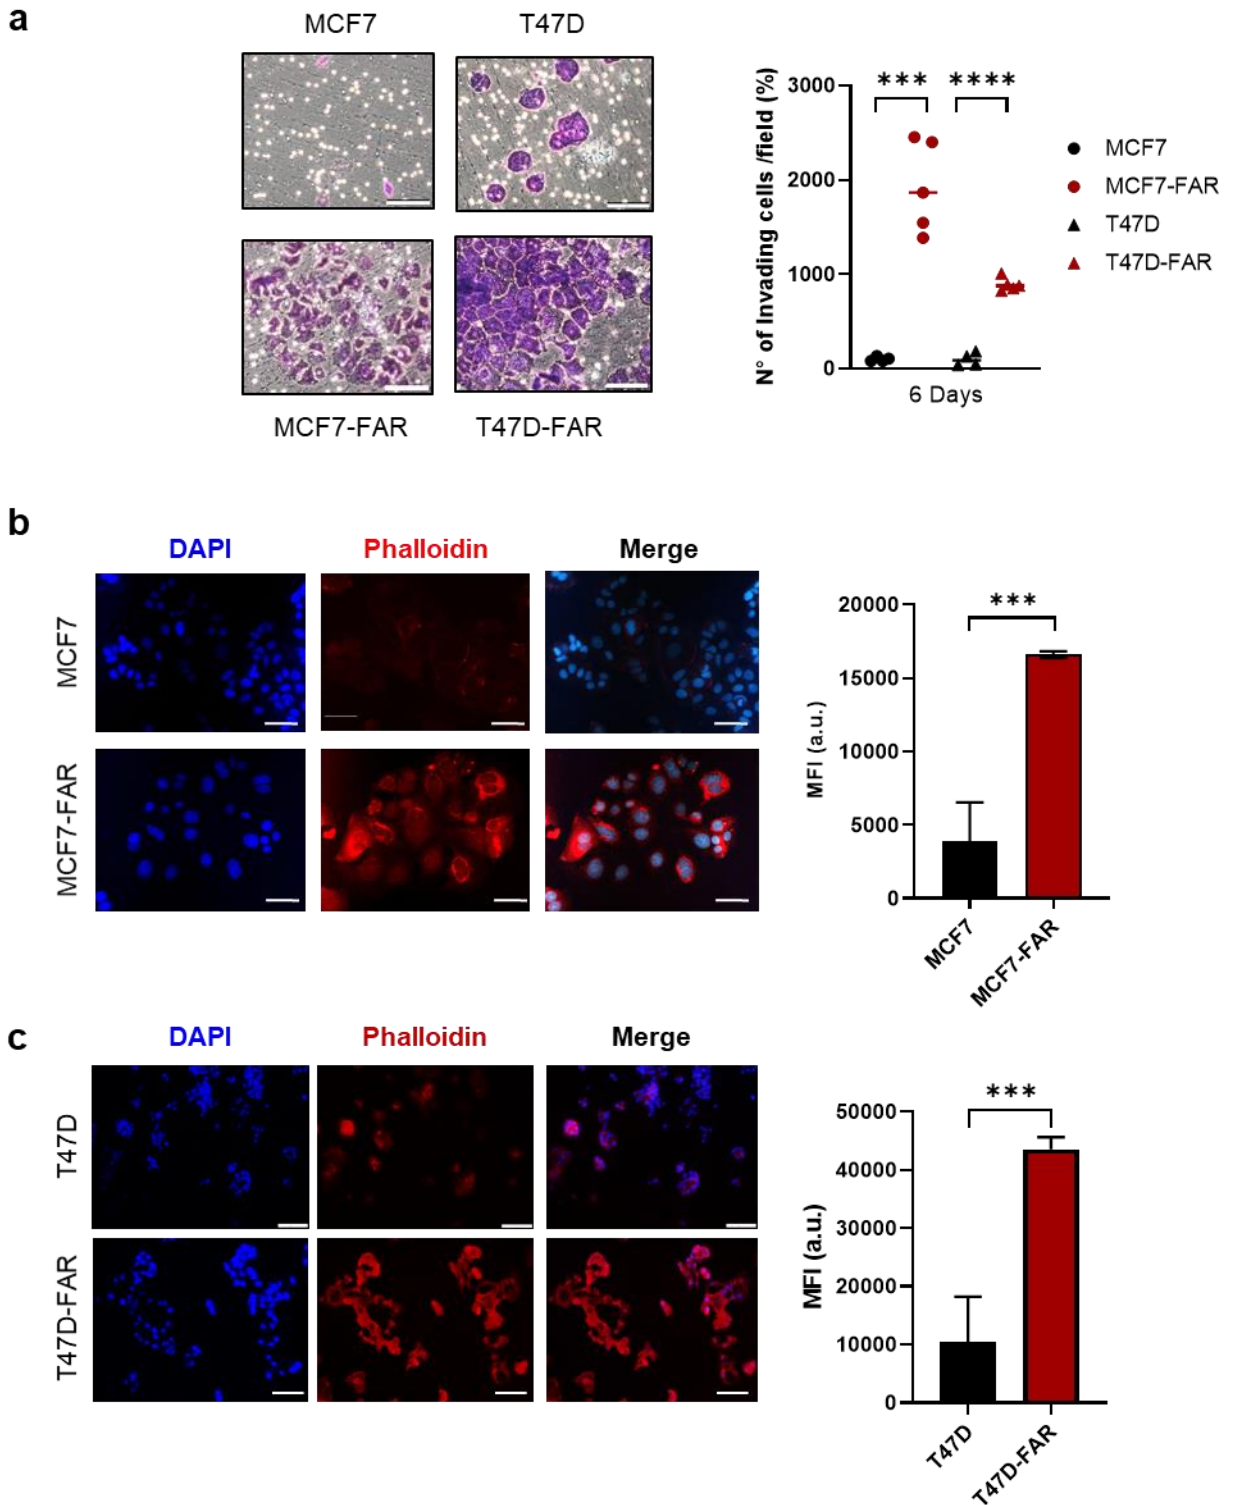

**Supplementary Figure 2.** Representative images of crystal violet stained MCF7, MCF7-FAR, T47D, or T47D-FAR invading cells through matrigel-coated transwell. All images were captured at 20x magnification (Bars = 200  $\mu$ m) (**a**). Scatter plot showing the mean of cell number *per* field reported as percentage relative to parental cells (**a, right**). Representative immunofluorescence (IF) staining for DAPI (blue) and Phalloidin (red) and merged images of MCF7 and MCF7-FAR cells (**b**) or T47D and T47D-FAR cells (**c**). All images were captured at 40x magnification (Bars = 50  $\mu$ m). Quantification of mean of fluorescence intensities was analyzed by ImageJ software. Data are plotted in the bar graphs as mean  $\pm$  SD of MCF7-FAR relative to MCF7 (**b, right**), and of T47D-FAR relative to T47D (**c, right**). For all panels, images are representatives from three independent experiments, performed in triplicates (\*\* $p < 0.001$ , \*\*\*\*  $p < 0.0001$ ; *Student's T-test*).

### Supplementary Figure 3. Analysis of protein expression levels of Pak1 in parental and FAR MCF7 or T47D.

a

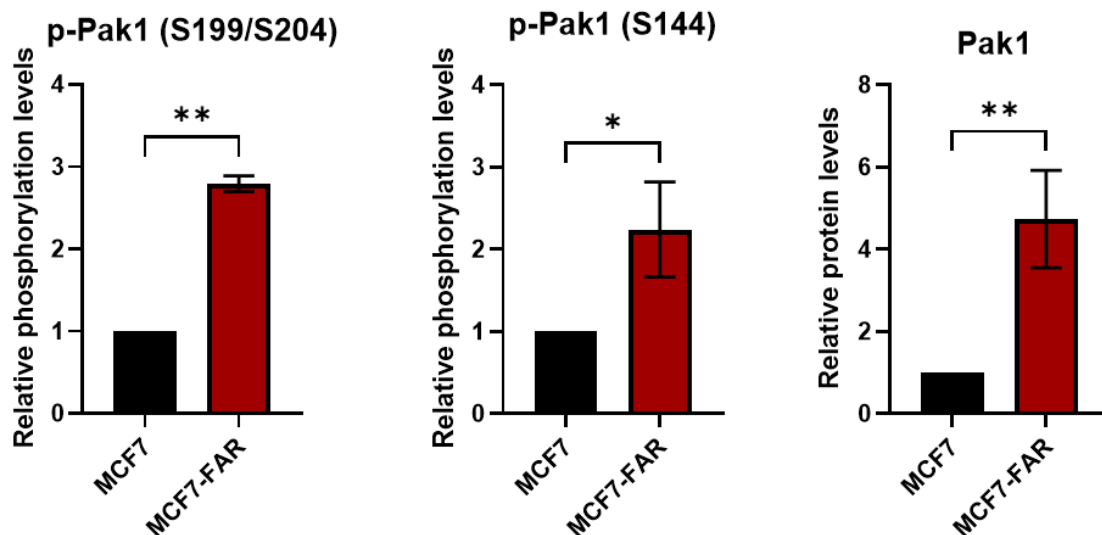

b

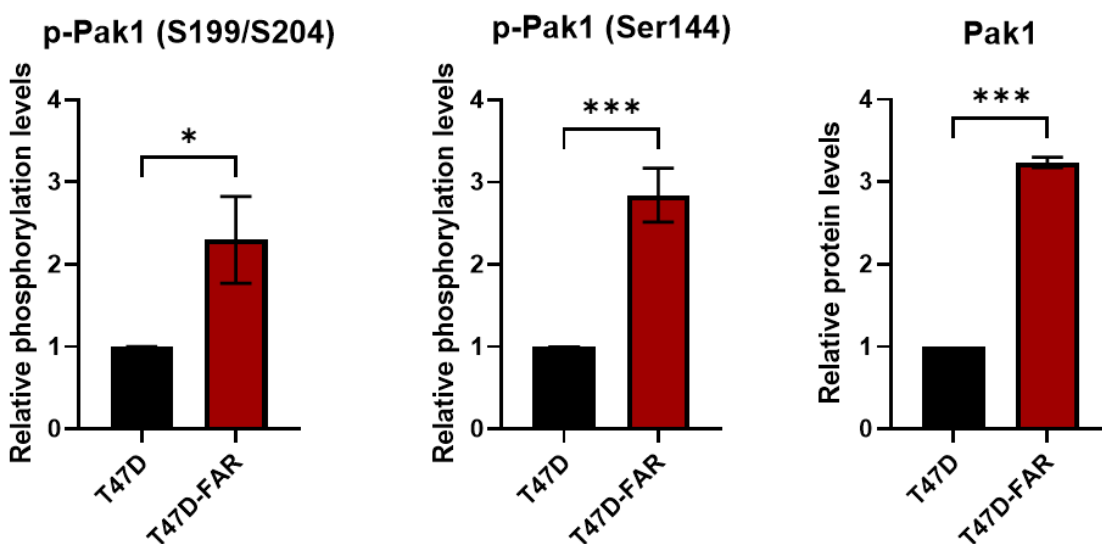

**Supplementary Figure 3.** Whole total lysates prepared from MCF7 and MCF7-FAR (a) or T47D, and T47D-FAR (b) were subjected to western blot analysis for p-Pak1 (S199/S204), p-Pak1 (S144); Pak1. Densitometric quantitation of the resulting molecular species performed using data from three independent experiments is reported in bar charts. Data are expressed as mean  $\pm$  standard deviation (\* $p < 0,05$ ; \*\* $p < 0.01$ , \*\*\* $p < 0.001$ ; Student's *T*-test).

## Supplementary Figure 4: Invasive capability of *PAK1* over-expressing and FAR cells.

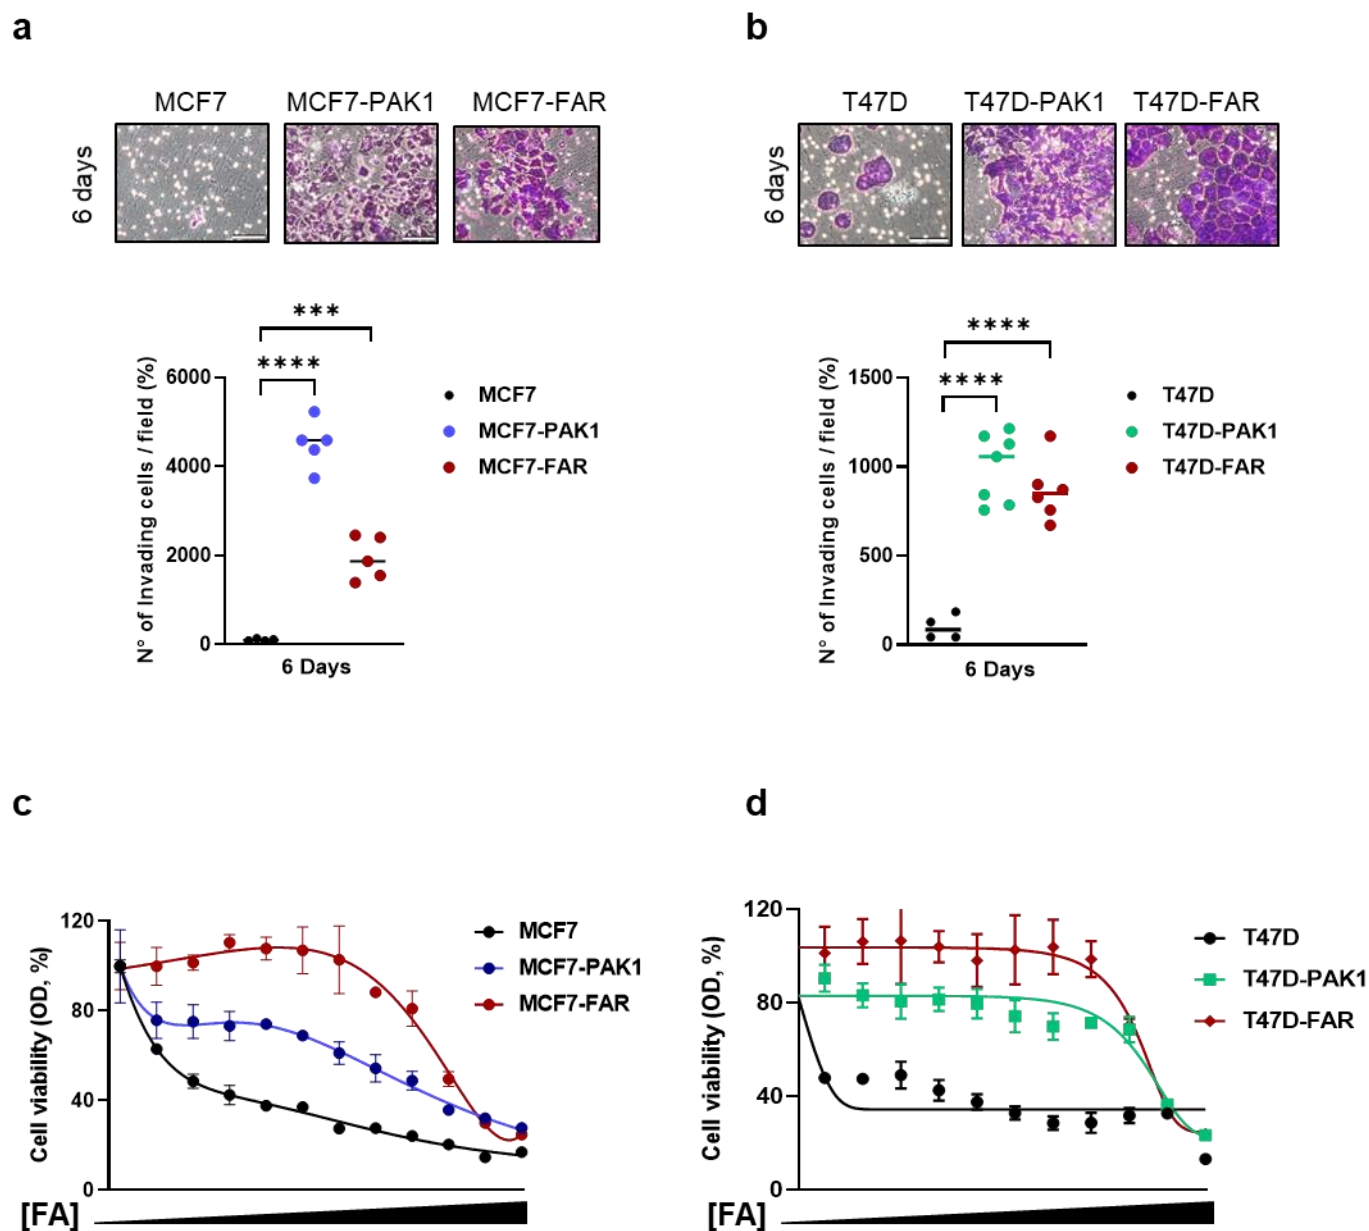

**Supplementary Figure 4.** Representative images of crystal violet stained MCF7, MCF7-PAK1, and MCF7-FAR (**a, top**) or T47D, T47D-PAK1, and T47D-FAR (**b, top**) invading cells through matrigel-coated transwell. All images were capture at 20x magnification (Bars = 200  $\mu$ m). Images are representative from three independent experiments, performed in triplicates. Scatter plot showing the mean of cell number *per* field reported as percentage relative to parental cells for MCF7 (**a, bottom**) and for T47D (**b, bottom**) models. Dose-response curves of MCF7, MCF7-PAK1, and MCF7-FAR (**c**) T47D, T47D-PAK1, and T47D-FAR (**d**) exposed to increasing doses of fulvestrant and abemaciclib (FA) up to 10  $\mu$ M or 2.5  $\mu$ M concentrations, respectively, every 72 hours for 1 week, and then stained with crystal violet solution. Each data point represents the percent of cell viability relative to vehicle-treated controls, and shown as mean  $\pm$  SD from two independent experiments. For all panels, (\*\*\*)  $p < 0.001$ , (\*\*\*\*)  $p < 0.0001$ ; *Student's T-test*).

**Supplementary Figure 5. PAK1 down-modulation impairs invasive capacity of MCF7-FAR and T47D-FAR cells**

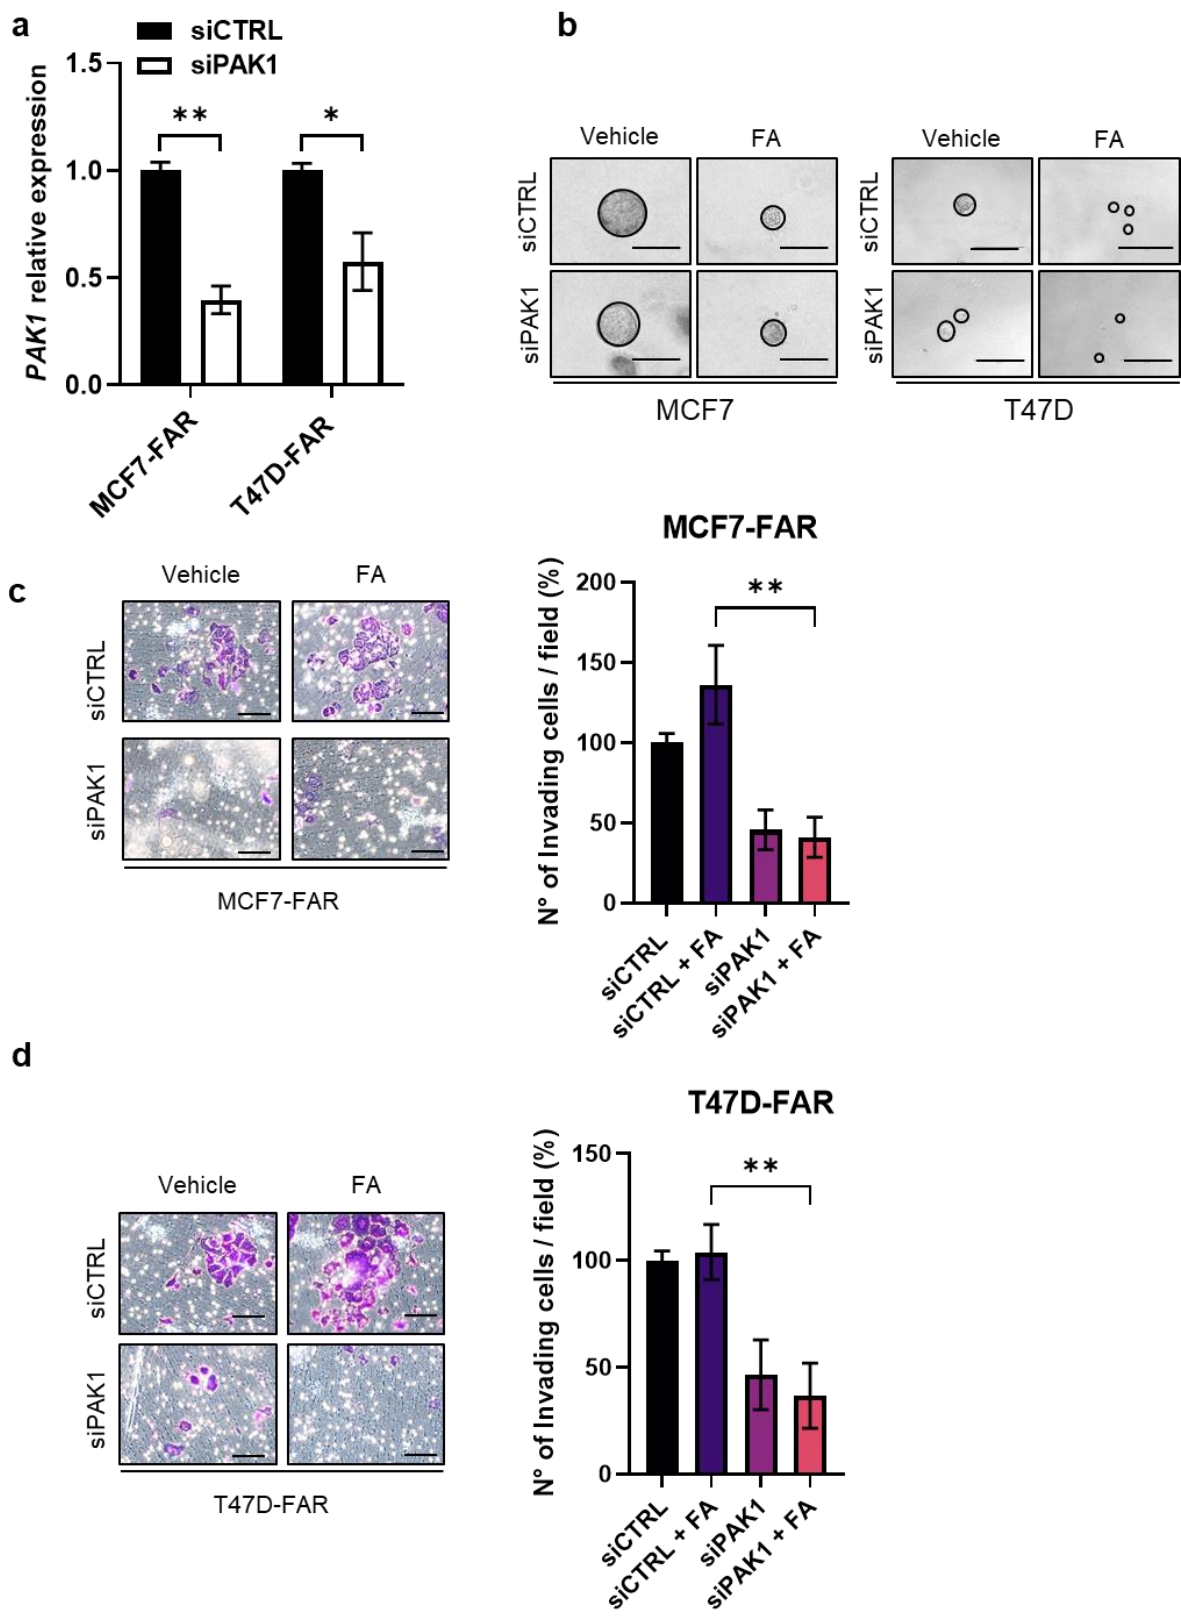

**Supplementary Figure 5.** Quantitative-PCR for *PAK1* gene expression 24 hours after siRNAs transfection in MCF7-FAR and T47D-FAR cells. Data are expressed as mean  $\pm$  SD relative to cells transfected with siRNA scrambled (siCTRL), from three independent experiments performed in triplicates ( $*p < 0.05$ ;  $**p < 0.01$ , *Student's T-test*) (a). Representative images of spheroids embedded in collagen type I matrix set up from MCF7 (b, left) or T47D cells (b, right) transfected with 40 nM siRNA scrambled (siCTRL) or siRNA targeting *PAK1* (siPAK1) in presence of vehicle or 1  $\mu$ M fulvestrant and 0.25  $\mu$ M abemaciclib for 6 days. All images were capture at 20x magnification (Bars = 200  $\mu$ m). Images are representative from three independent experiments performed in triplicate. Representative images of crystal violet stained MCF7-FAR (c, left) or T47D-FAR (d, right) invading cells through matrigel-coated transwell, treated as described in panel b. Images are representative from three independent experiments, performed in triplicate. Bar graphs showing the mean of cell number *per field* reported as percentage relative to vehicle-treated controls for MCF7-FAR (c, right) and for T47D-FAR (d, right). For all panels, ( $**p < 0.01$ , *Student's T-test*).



# Supplementary Figure 6. Impairment of FAR cell growth and invasion upon NVS-PAK1-1 treatment

**a**

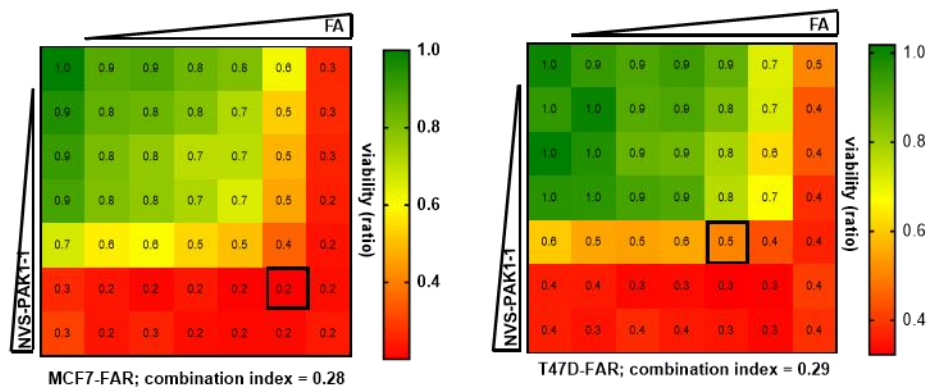

**b**

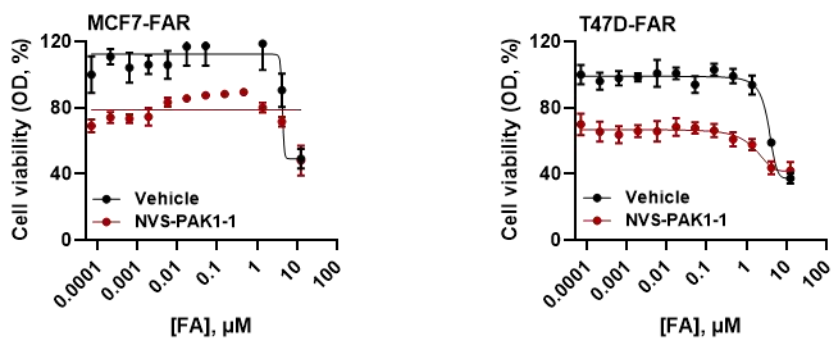

**c**

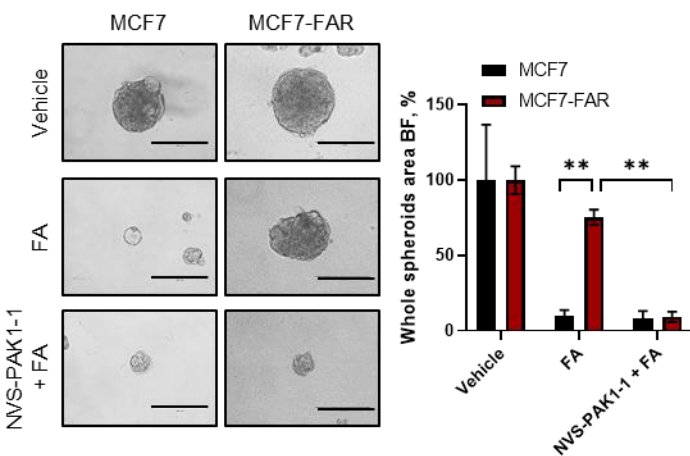

**d**

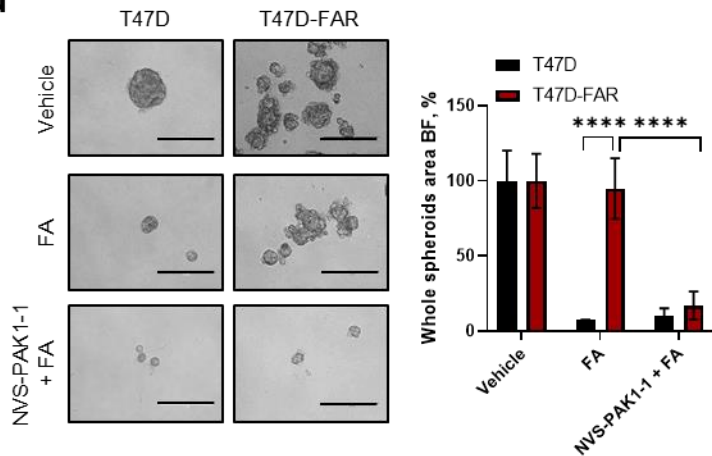

**e**

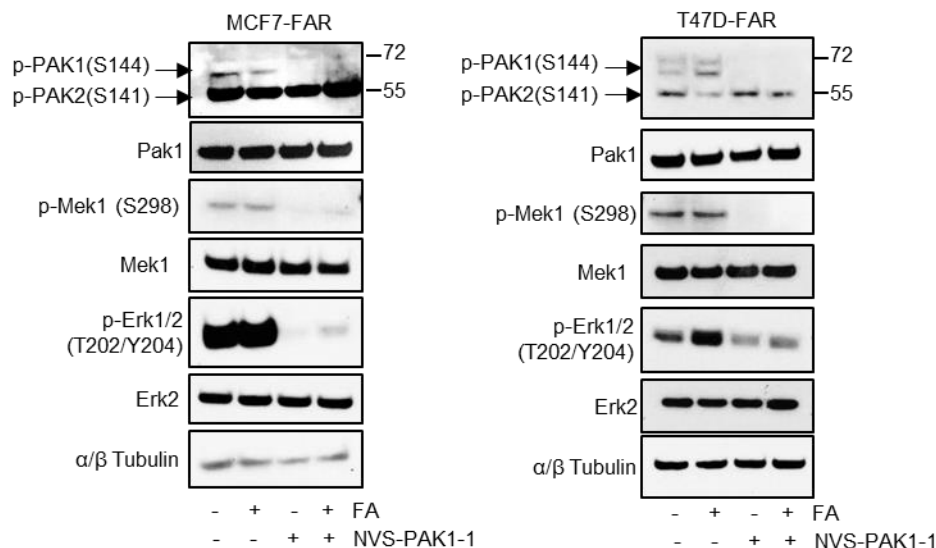

**Supplementary Figure 6.** Viability assays to test synergy between fulvestrant and abemaciclib (FA) and NVS-PAK1-1. Cells were treated with increasing concentrations of FA and NVS-PAK1-1 (up to 10 $\mu$ M and 100 $\mu$ M, respectively) alone or in combination every 72 h until vehicle-treated controls reached ~90% of confluence. Intensity values of cell monolayers stained with crystal violet were used to perform the Chou-Talalay test. Numbers inside each box indicate the *ratio* of viable treated cells to untreated cells from three independent experiments for MCF7-FAR (**a, left**) and for T47D-FAR (**a, right**). Dose-response curves of MCF7-FAR (**b, left**) or T47D-FAR (**b, right**) exposed to increasing doses of fulvestrant and abemaciclib (FA, up to 10 $\mu$ M fulvestrant and 2.5  $\mu$ M abemaciclib) in presence or not of 10 $\mu$ M NVS-PAK-1 for 1 week. Representative images of MCF7 and MCF7-FAR (**c, left**) or T47D and T47D-FAR (**d, left**) spheroids exposed to 400nM fulvestrant and 100nM abemaciclib (FA)  $\pm$  5  $\mu$ M NVS-PAK1-1. Bar graphs showing percentage of whole spheroids area upon fulvestrant and abemaciclib (FA)  $\pm$  NVS-PAK1-1 treatment compared to spheroids treated with vehicle (plotted as 100%) are reported for MCF7 (**c, right**) and T47D (**d, right**) models. Western Blot analysis of MCF7-FAR (**e, left**) and T47D-FAR (**e, right**) treated with fulvestrant and abemaciclib (FA, 1 $\mu$ M and 0.25  $\mu$ M, respectively), NVS-PAK1-1 (40 $\mu$ M) or the combination for 48 hours.  $\alpha/\beta$  tubulin was used as loading control. For all panels, data are plotted as means  $\pm$  SD of three independent experiments performed in triplicate or quadruplicate (\*\* $p$  < 0.01; \*\*\*\* $p$  < 0.0001; 2way ANOVA Bonferroni's multiple comparisons).



# Supplementary Fig. 7: PF309 and NVS-PAK1-1 affect invasion of *PAK1* over-expressing and FAR cells

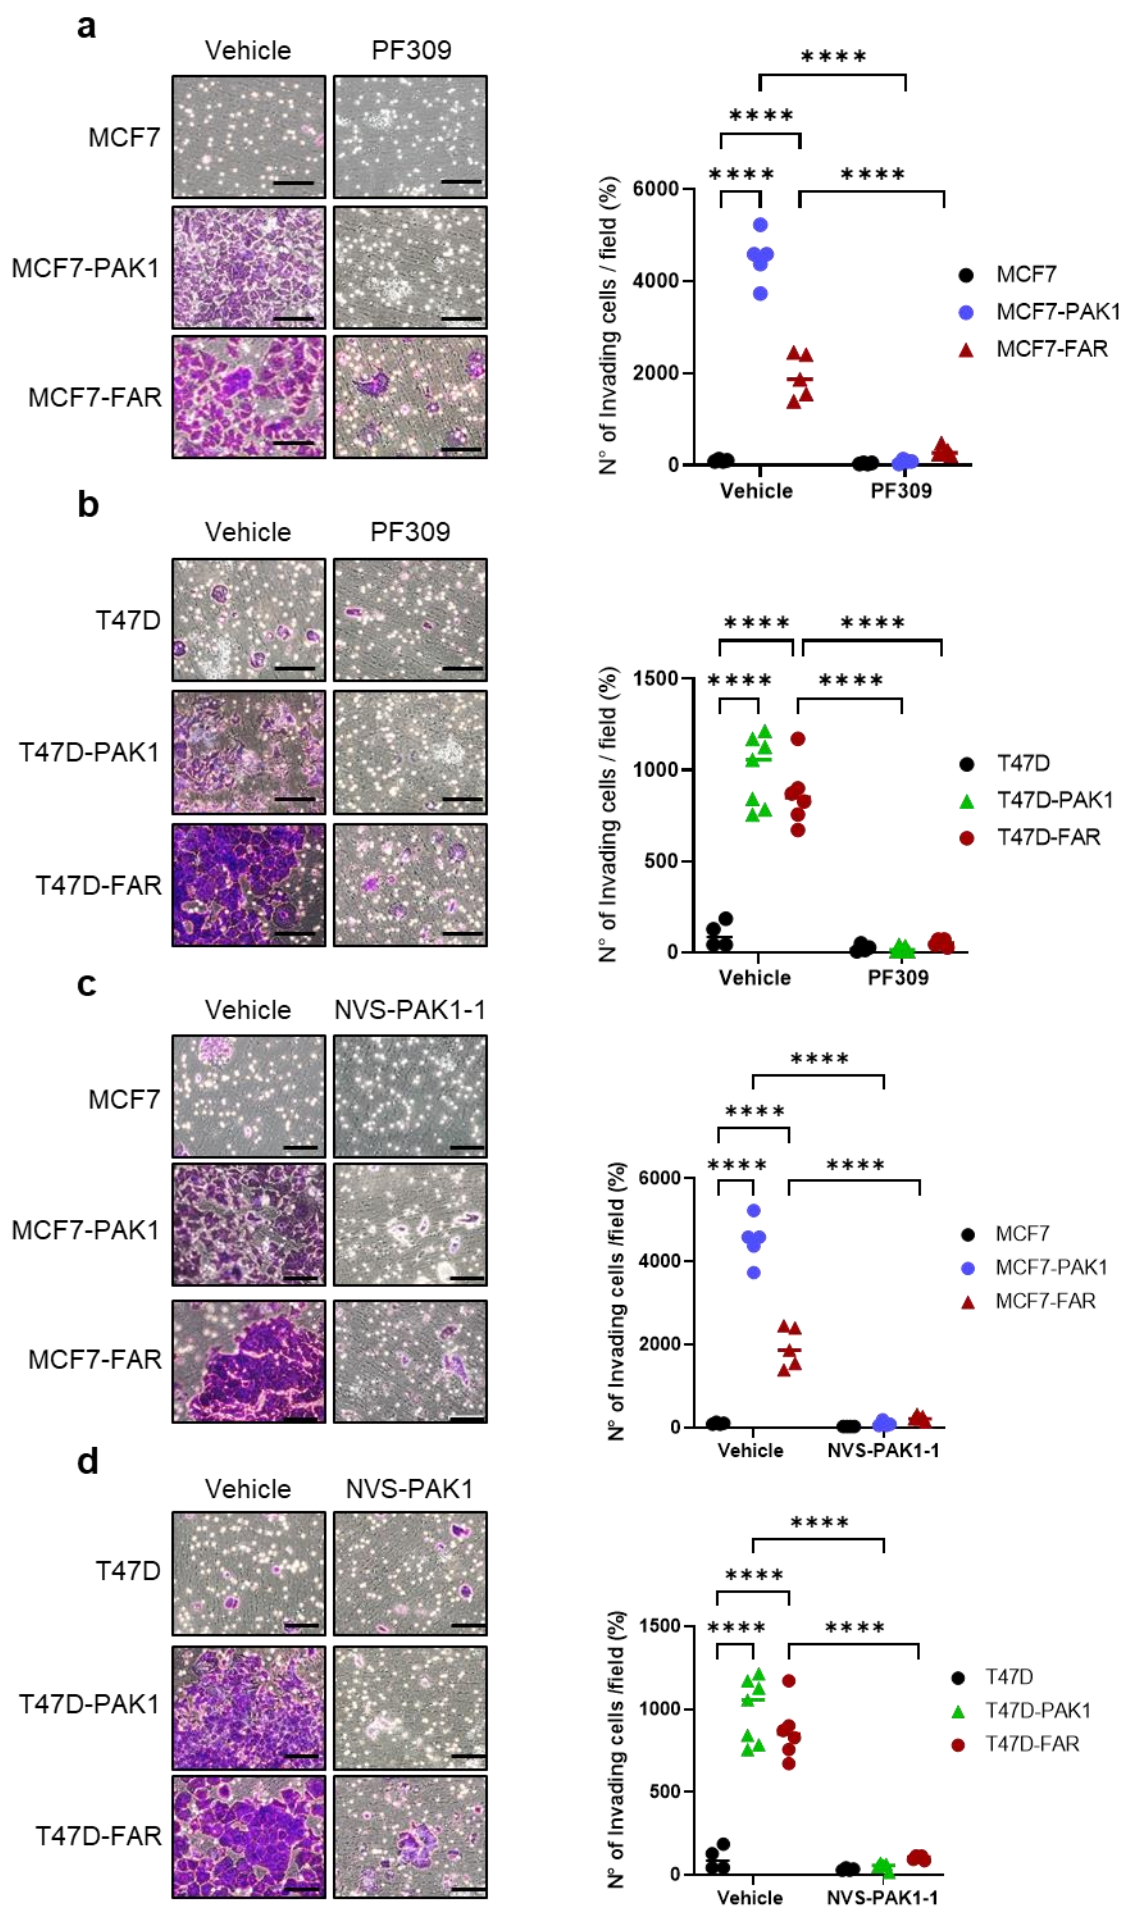

**Supplementary Figure 7.** Representative images of crystal violet stained MCF7, MCF7-PAK1, and MCF7-FAR invading cells, through matrigel-coated transwell, treated with 10nM PF309 (**a, left**) or NVS-PAK1-1 10 $\mu$ M (**c, left**) and T47D, T47D-PAK1 and T47D-FAR cells treated with 10nM PF309 (**b, left**) or NVS-PAK1-1 10  $\mu$ M (**d, left**) for 6 days. All images were captured at 20x magnification (Bars = 200  $\mu$ m). Images are representative from three independent experiments, performed in triplicates. Scatter plots showing the mean of cell number *per* field reported as percentage relative to parental cells MCF7 or T47D (**a-d, right**). Middle lines represent median. For all panels (\*\* $p$ <0.001, \*\*\*\*  $p$ <0.0001; 2way ANOVA Bonferroni's multiple comparisons).

# Supplementary Figure 8. Body weight of Balb/c female

a

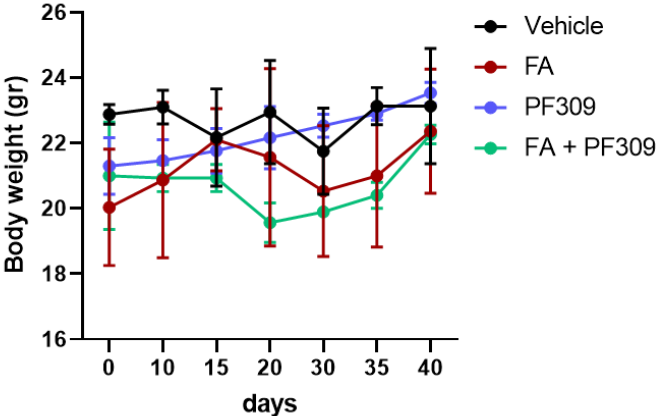

**Supplementary Figure 8.** Line chart showing body weight trend of Balb/c nude mice treated with vehicle, fulvestrant and abemaciclib (FA), PF309 and their combination as described in Fig.6 (a).

**Figure 2**

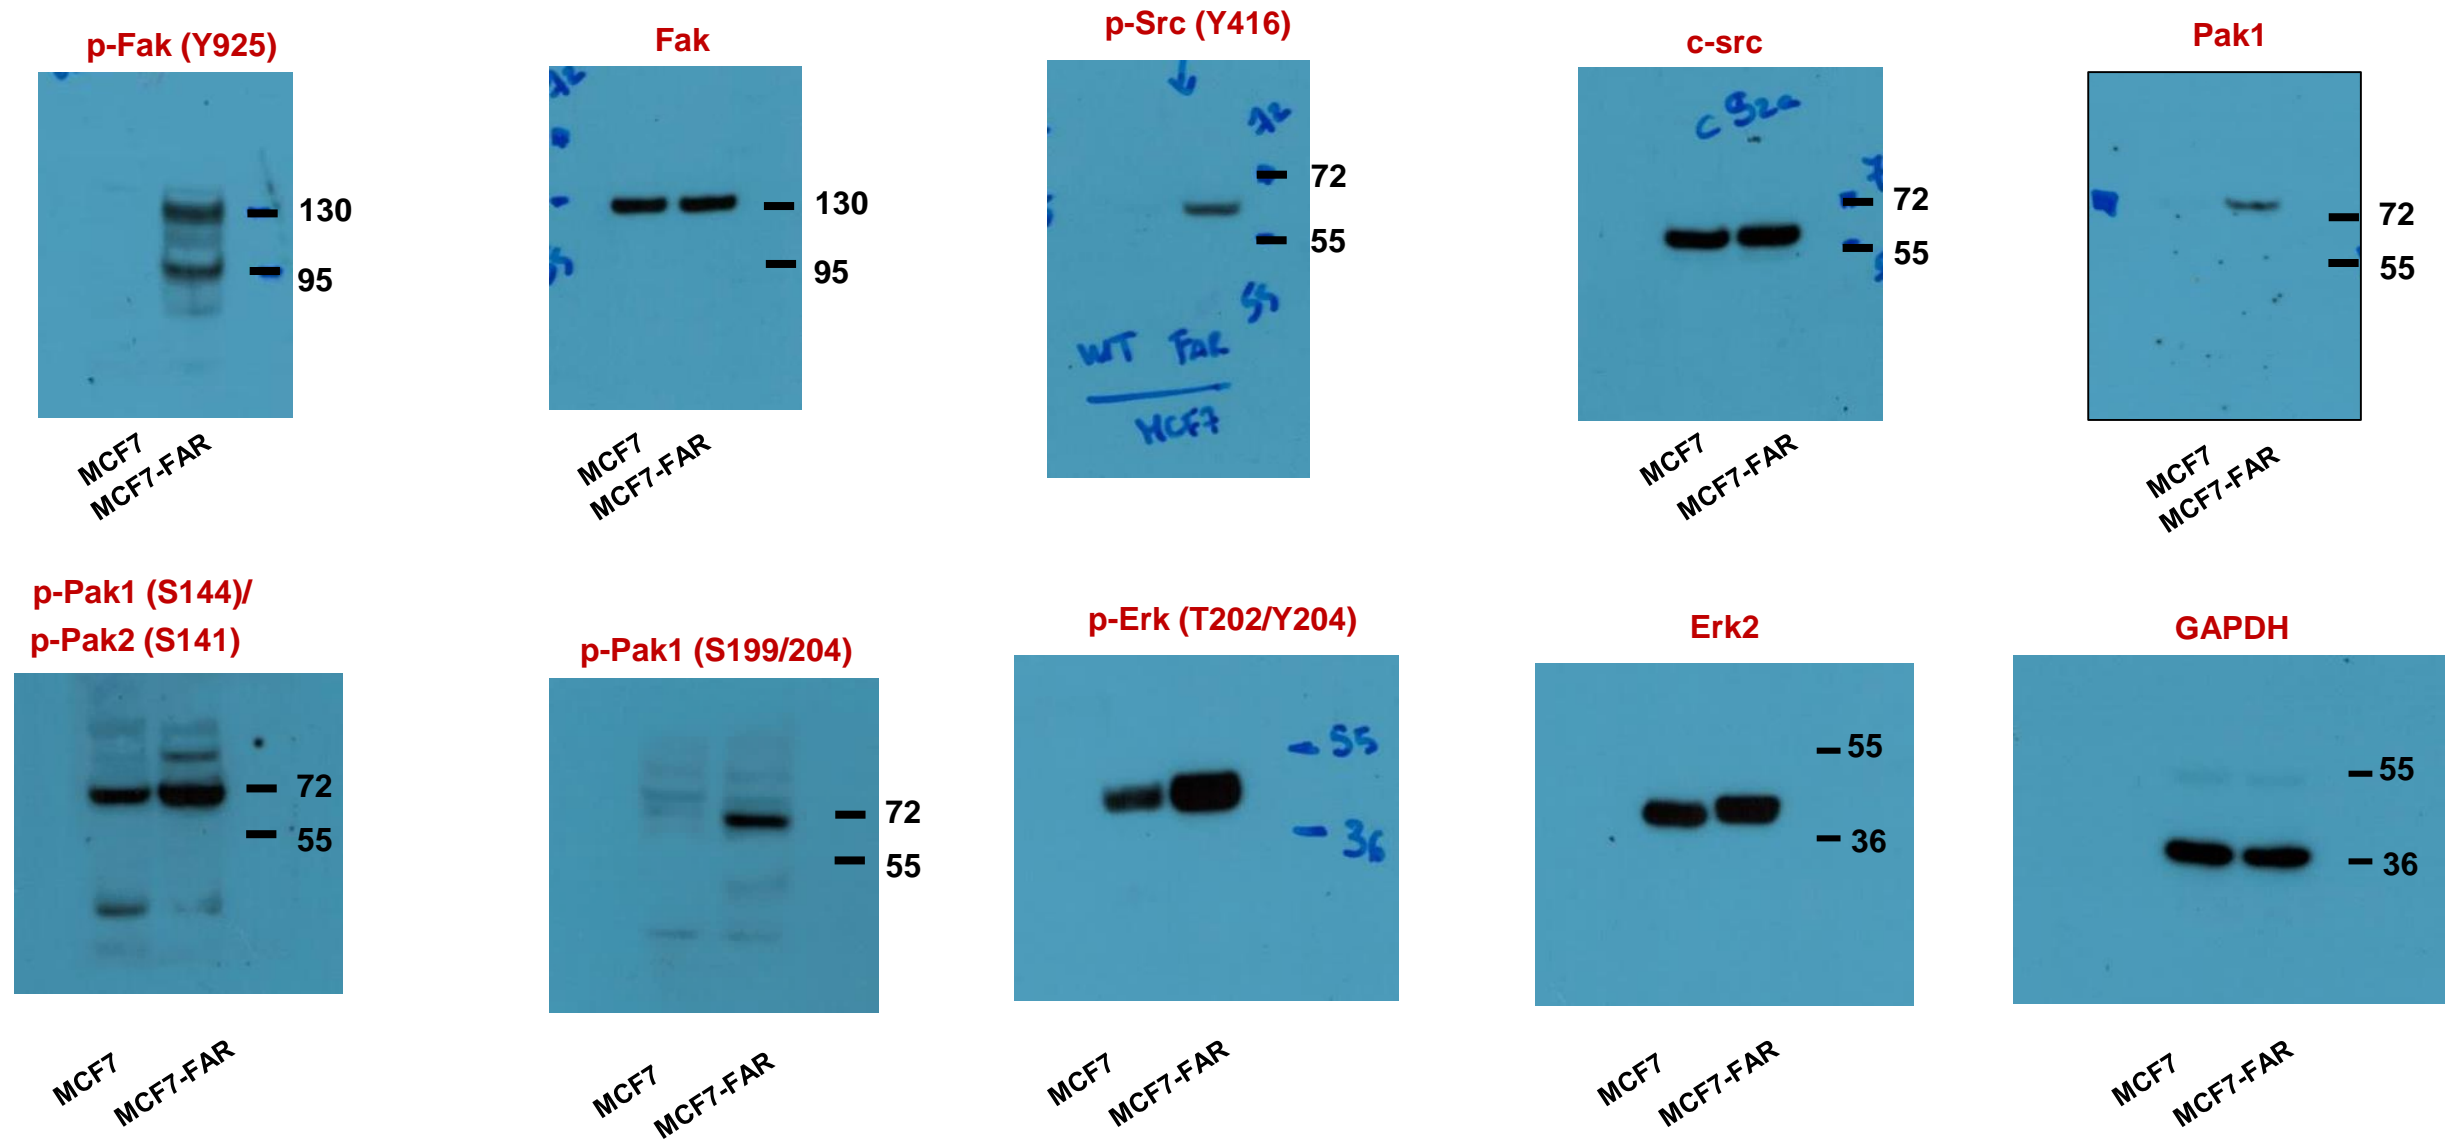

**Figure 2**

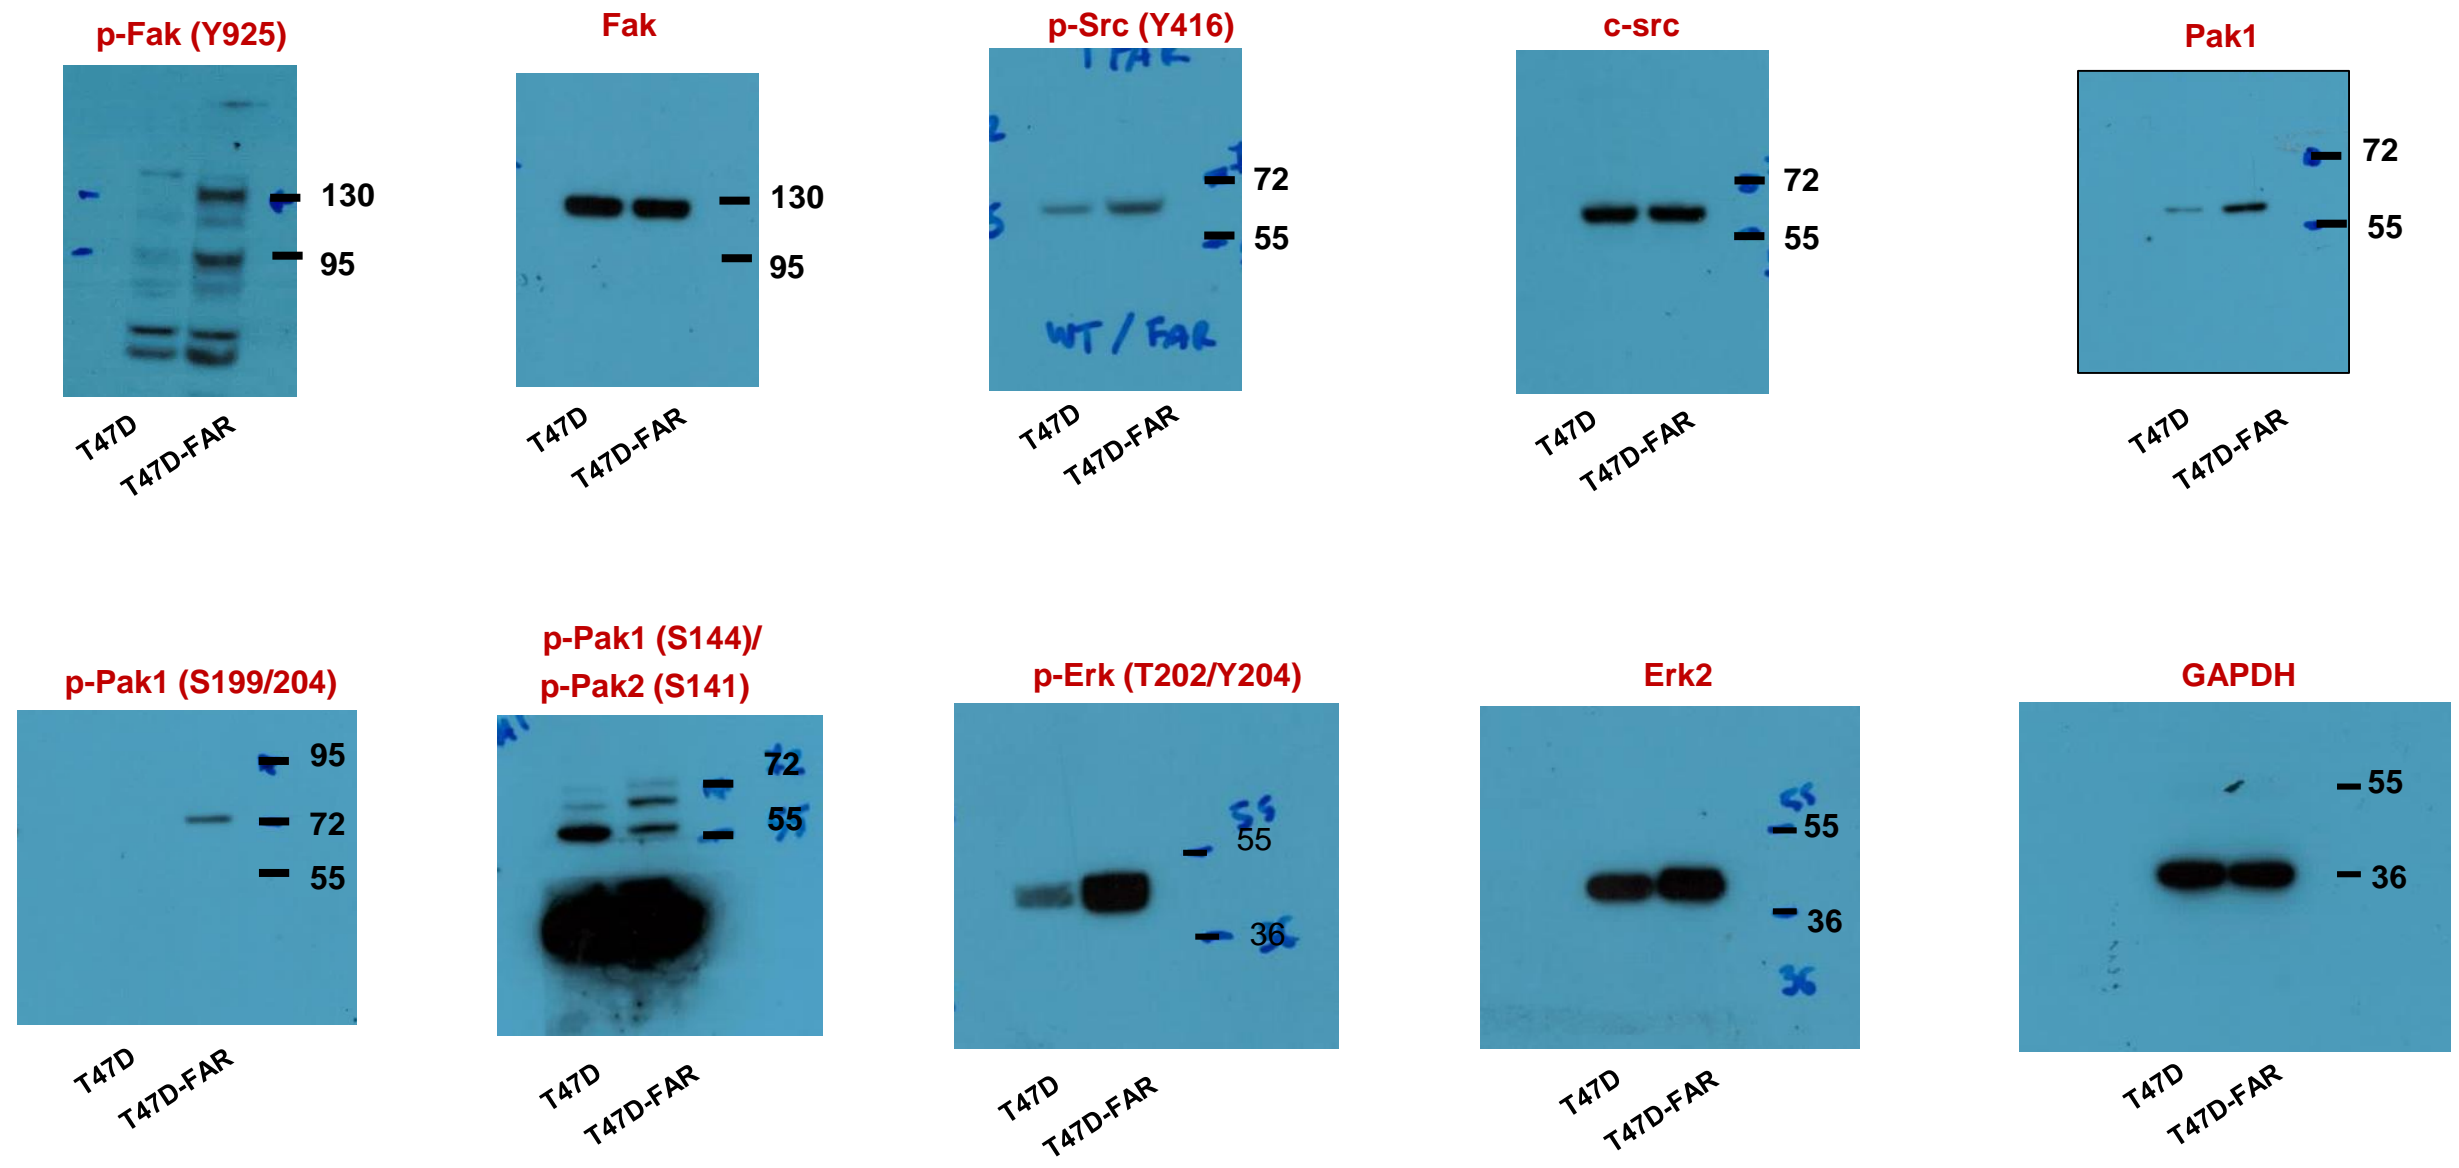

Figure 3

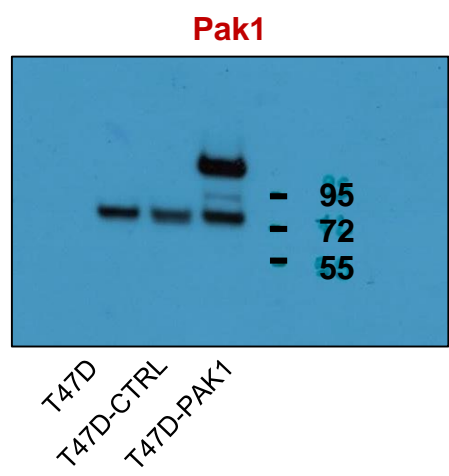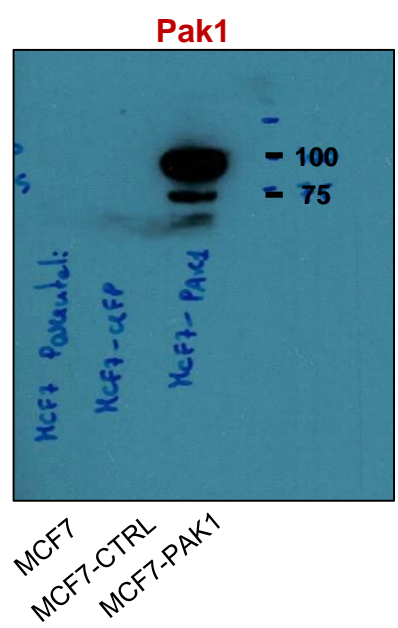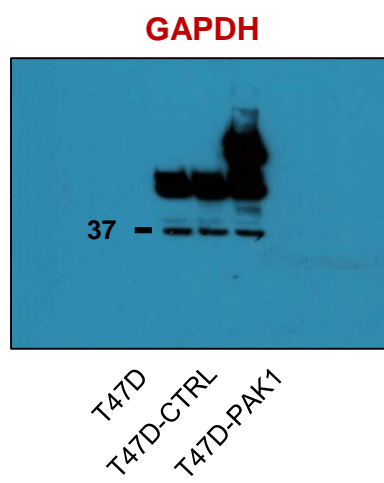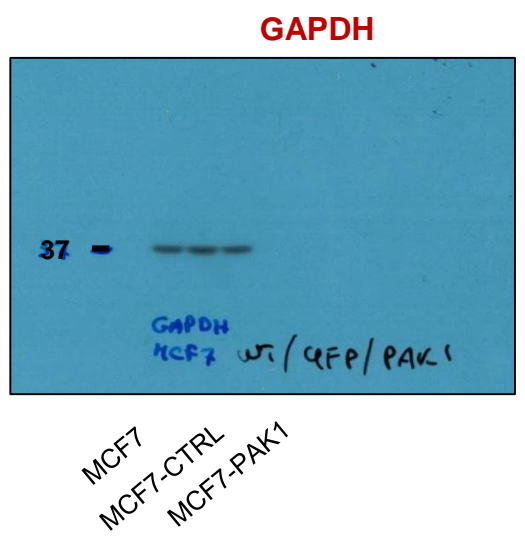

**Figure 4**

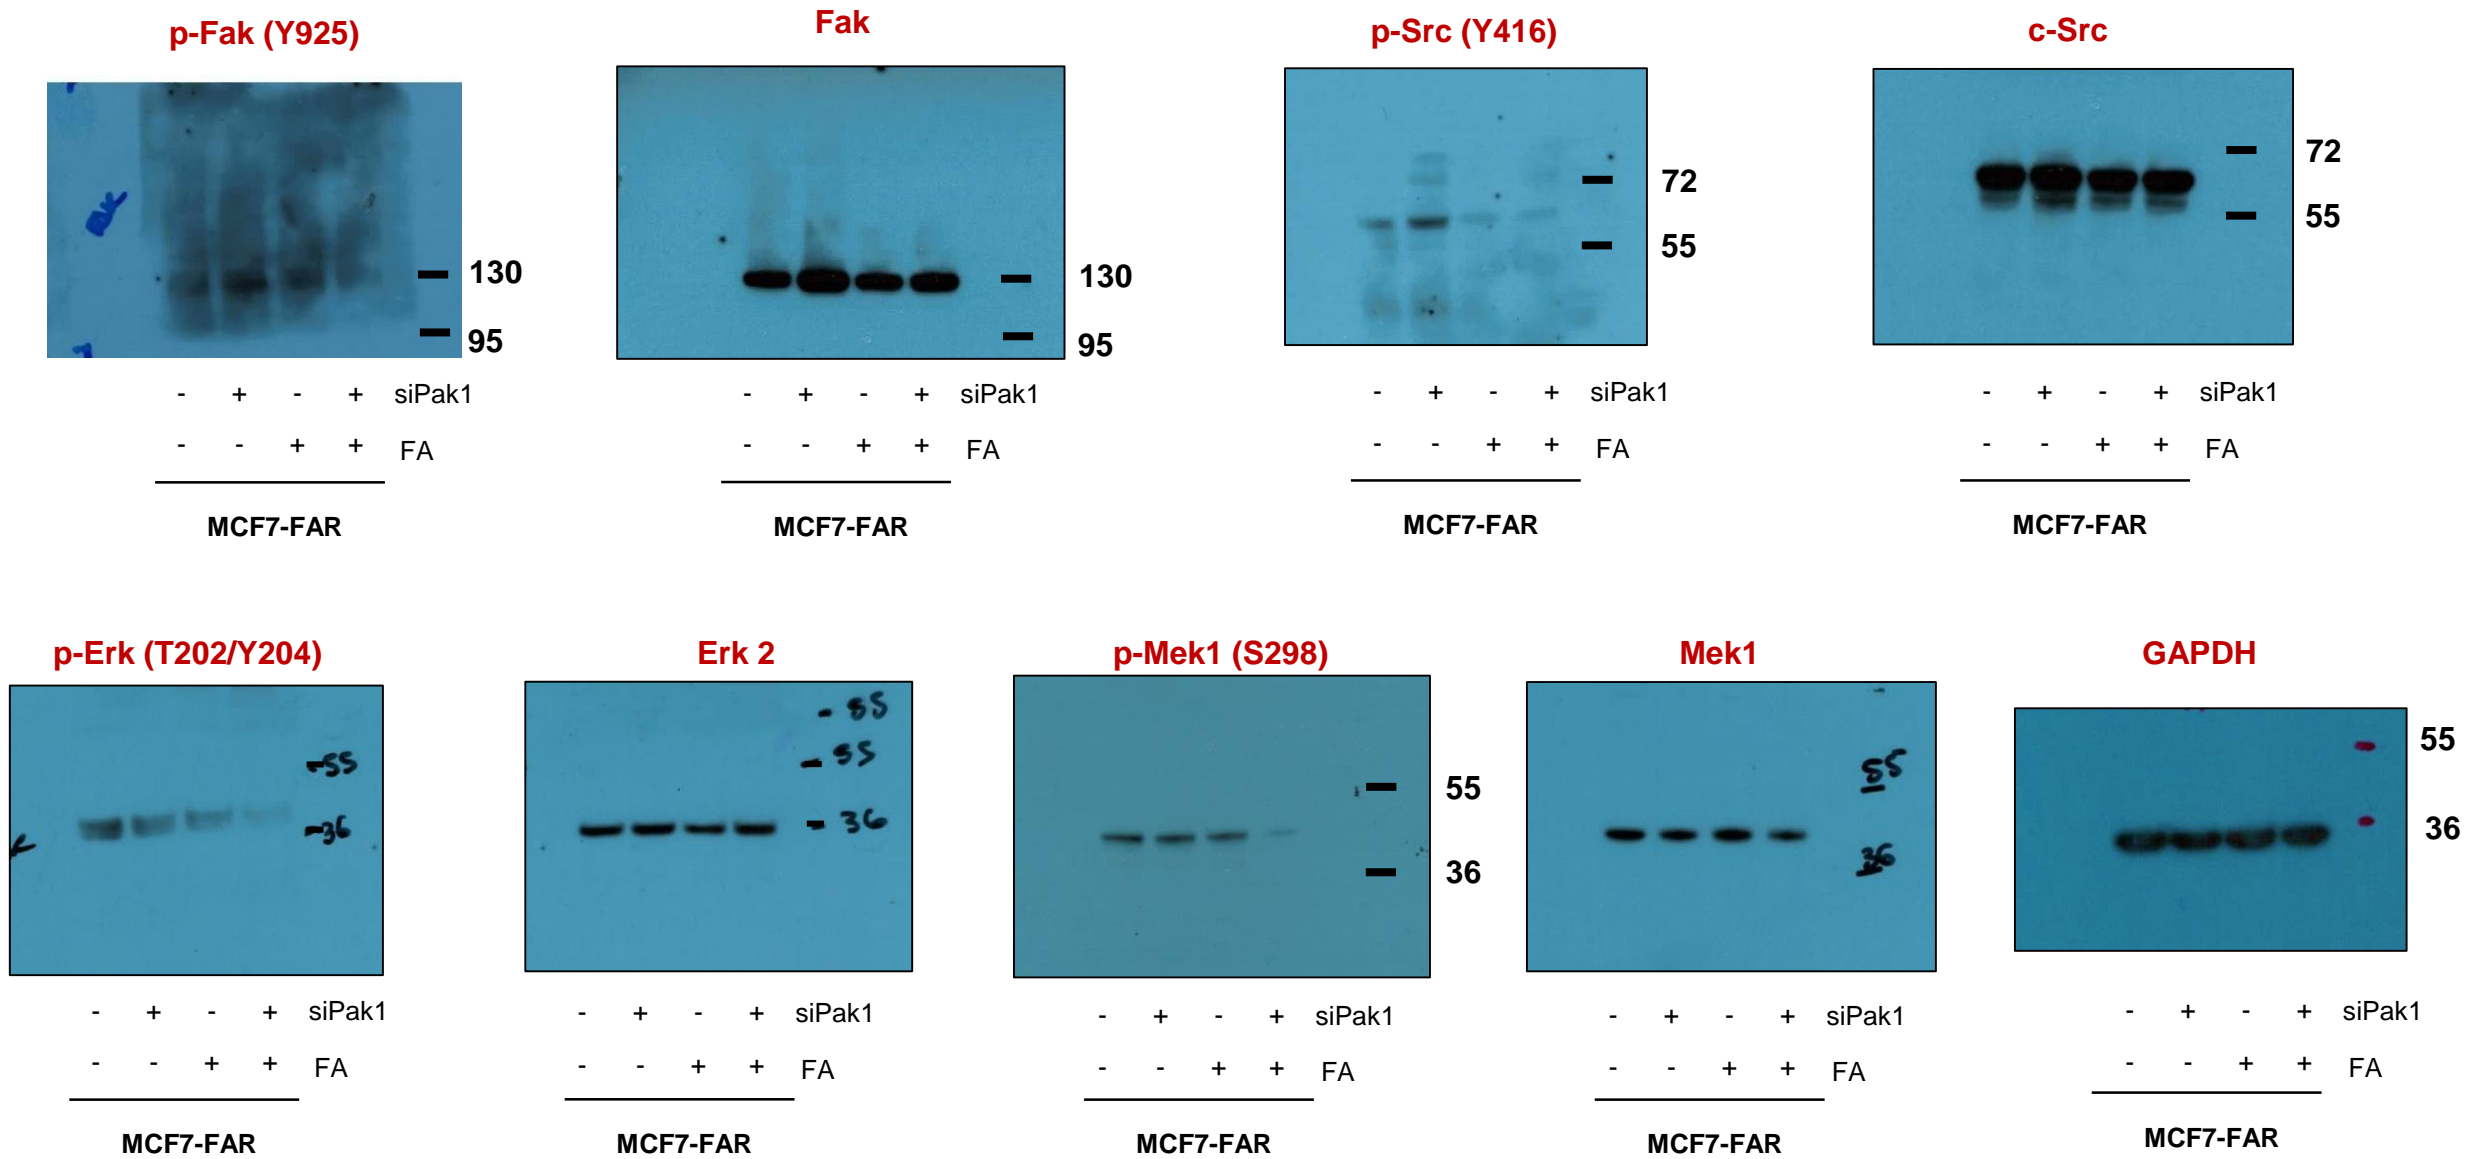



**Figure 4**

**p-Fak (Y925)**

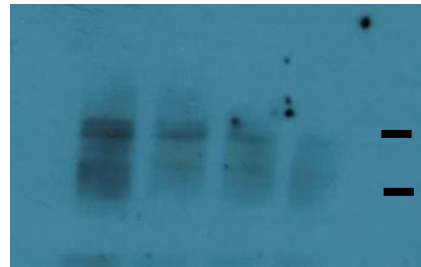

- + - + siPak1  
- - + + FA

T47D-FAR

**Fak**

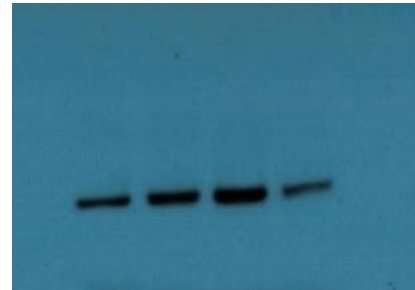

- + - + siPak1  
- - + + FA

T47D-FAR

**p-Src (Y416)**

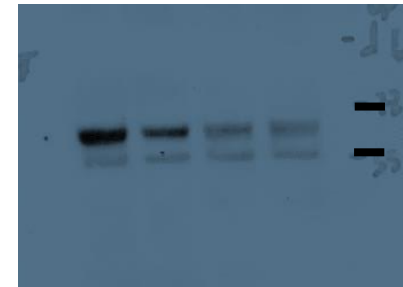

- + - + siPak1  
- - + + FA

T47D-FAR

**c-Src**

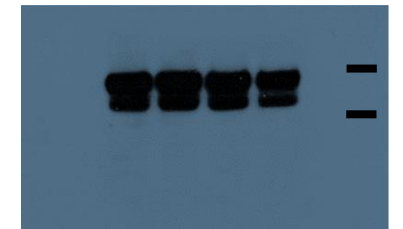

- + - + siPak1  
- - + + FA

T47D-FAR

**p-Erk (T202/Y204)**

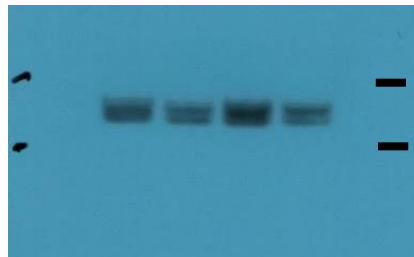

- + - + siPak1  
- - + + FA

T47D-FAR

**Erk2**

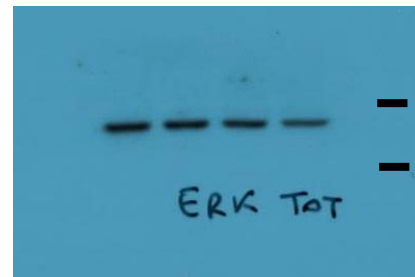

- + - + siPak1  
- - + + FA

T47D-FAR

**p-Mek1 (S298)**

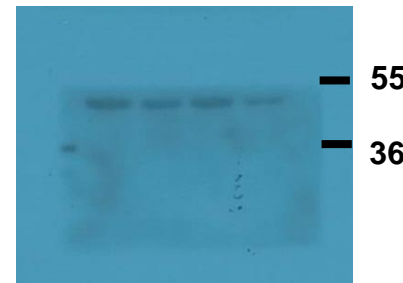

- + - + siPak1  
- - + + FA

T47D-FAR

**Mek1**

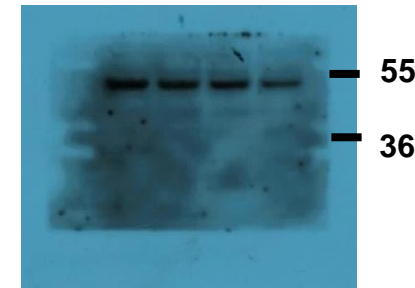

- + - + siPak1  
- - + + FA

T47D-FAR

**GAPDH**

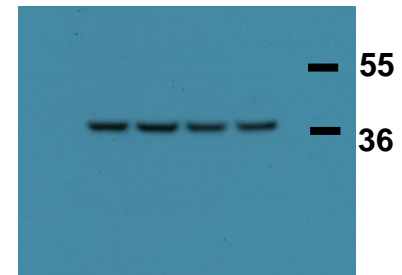

- + - + siPak1  
- - + + FA

T47D-FAR

Figure 5

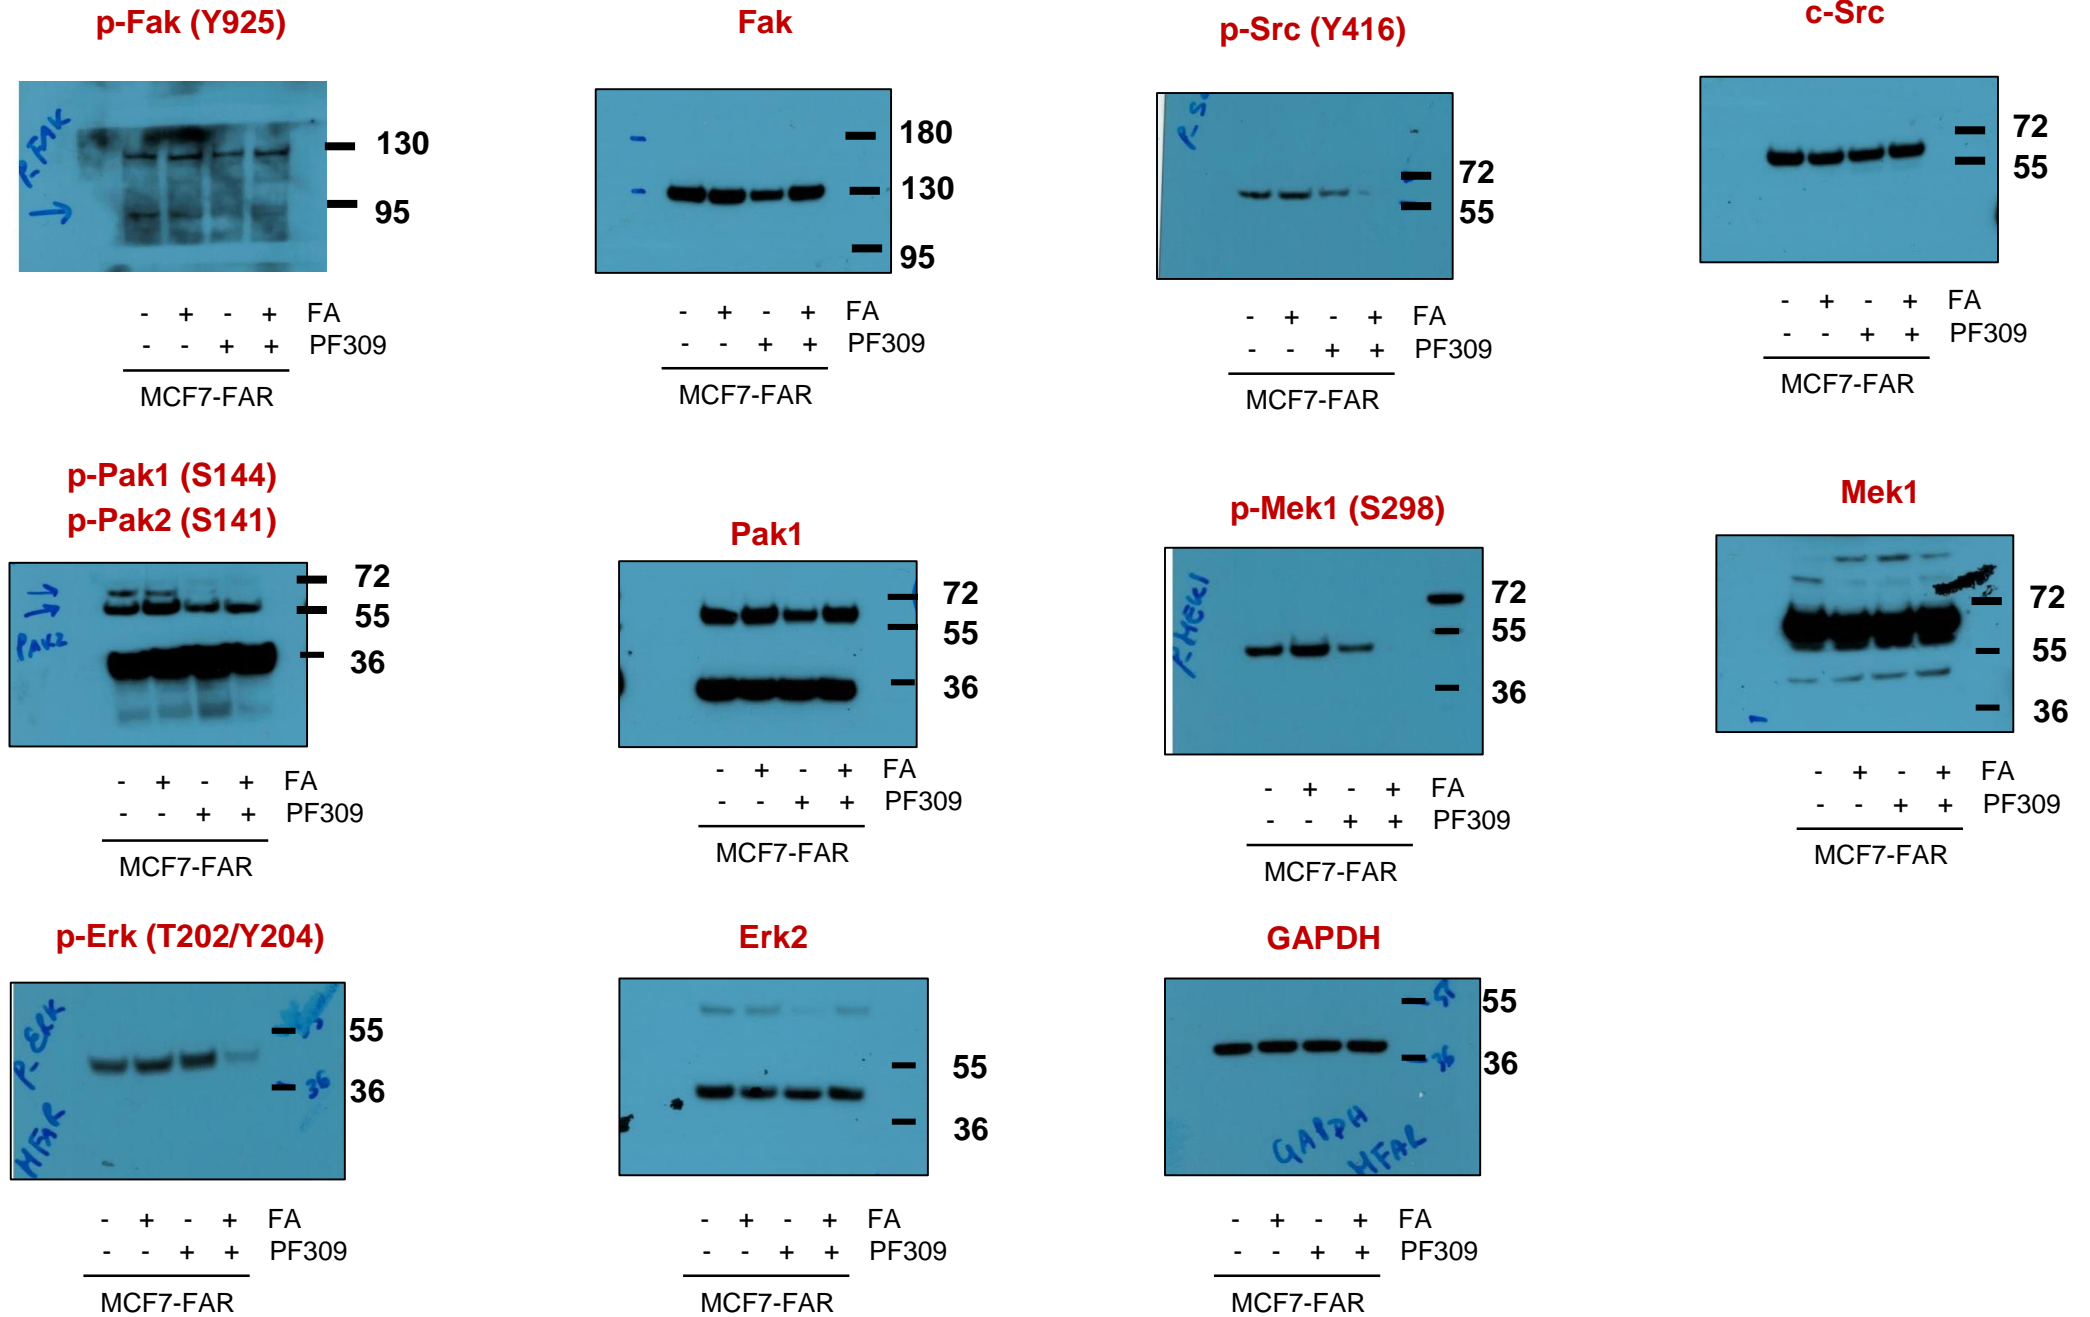

**Figure 5**

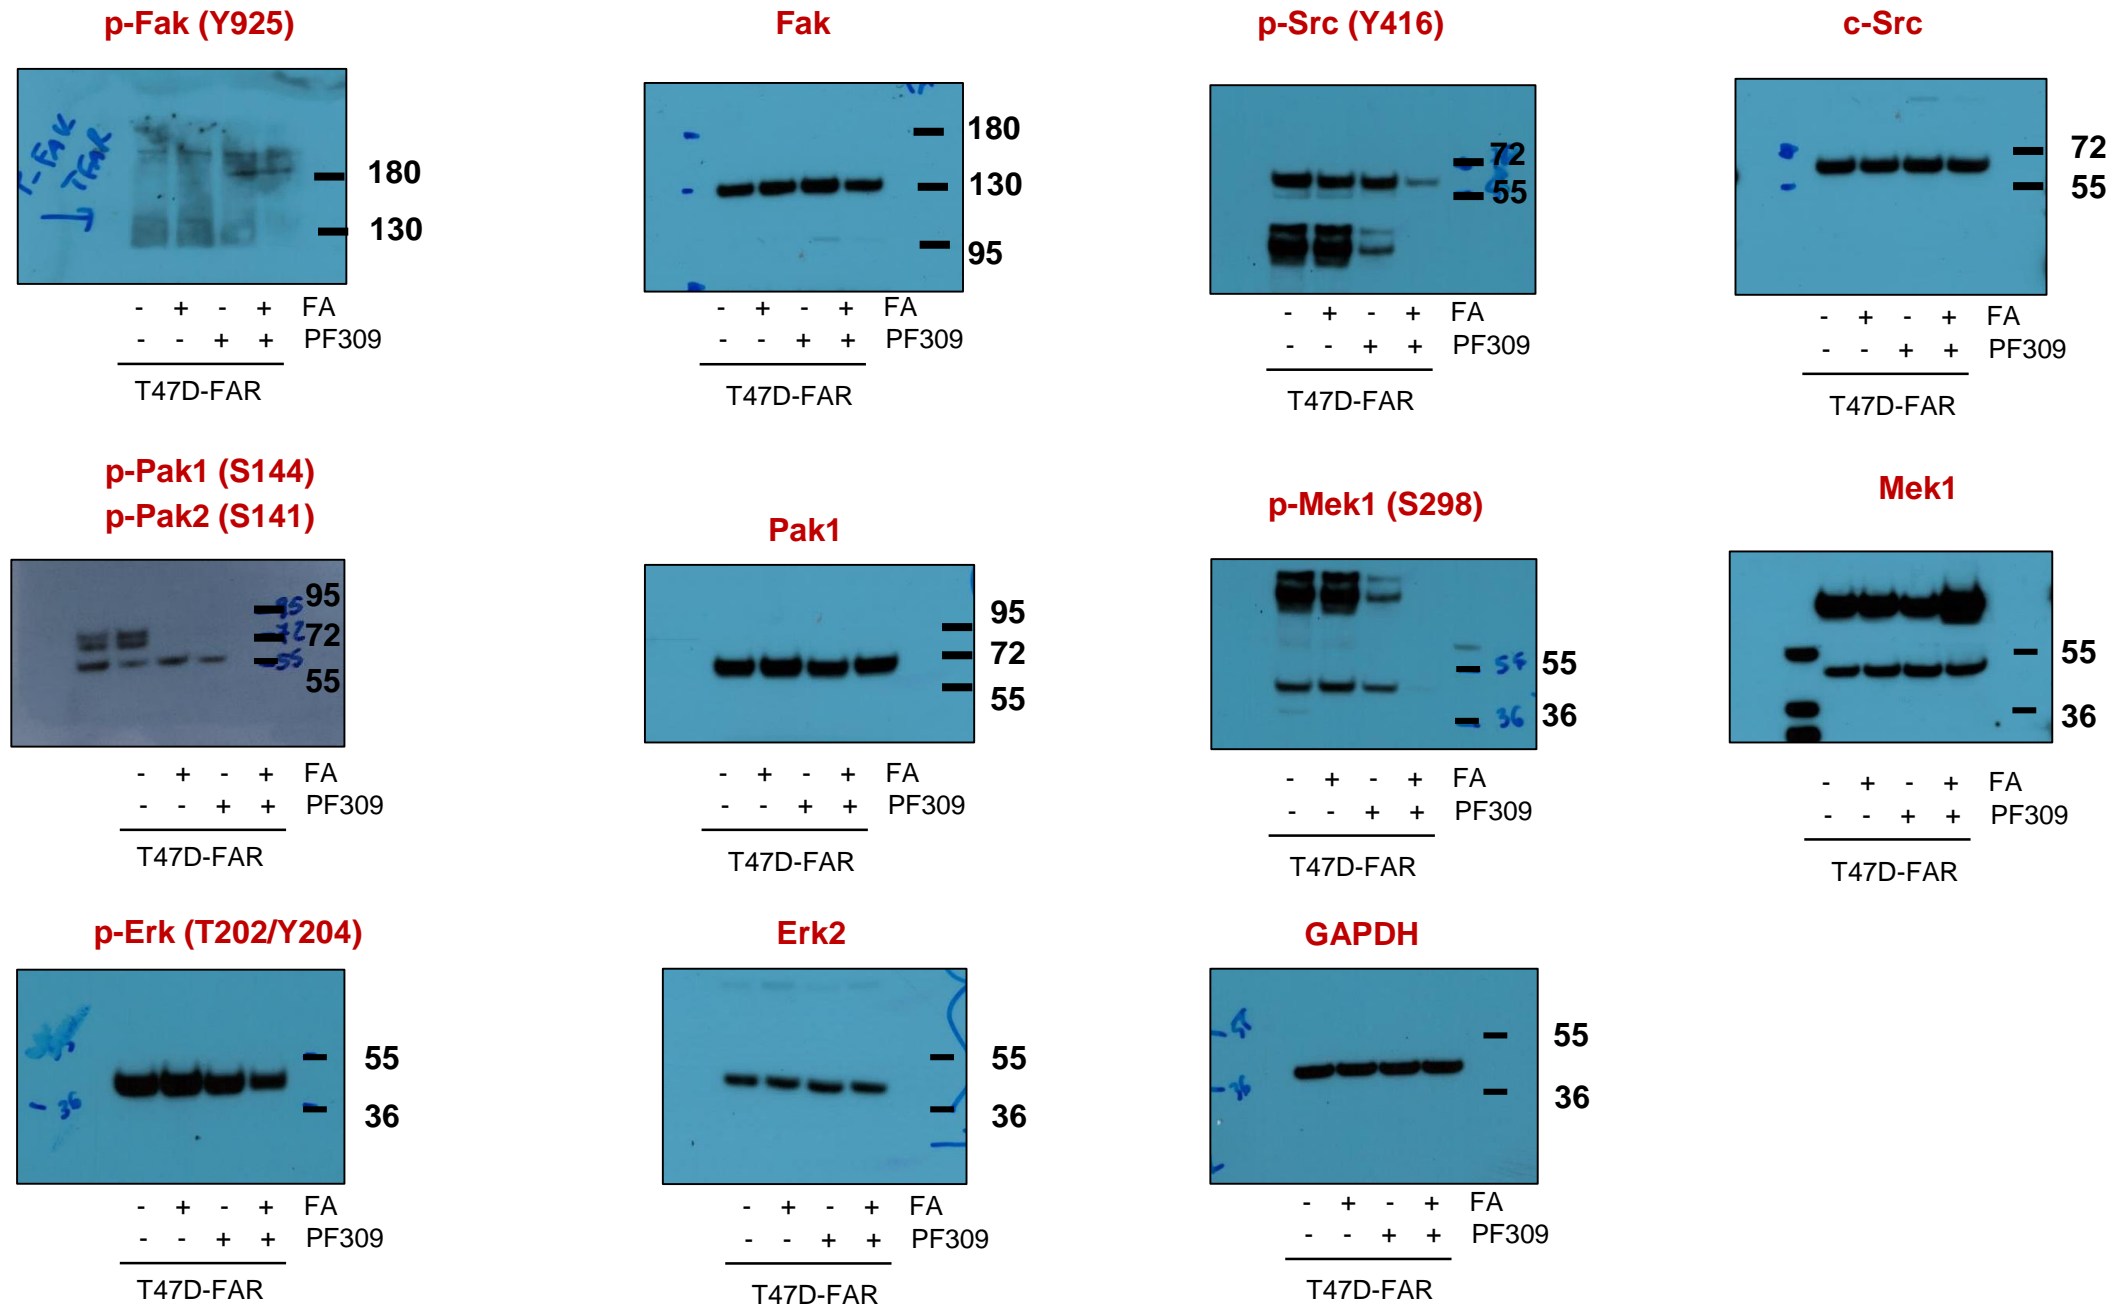

Figure 6

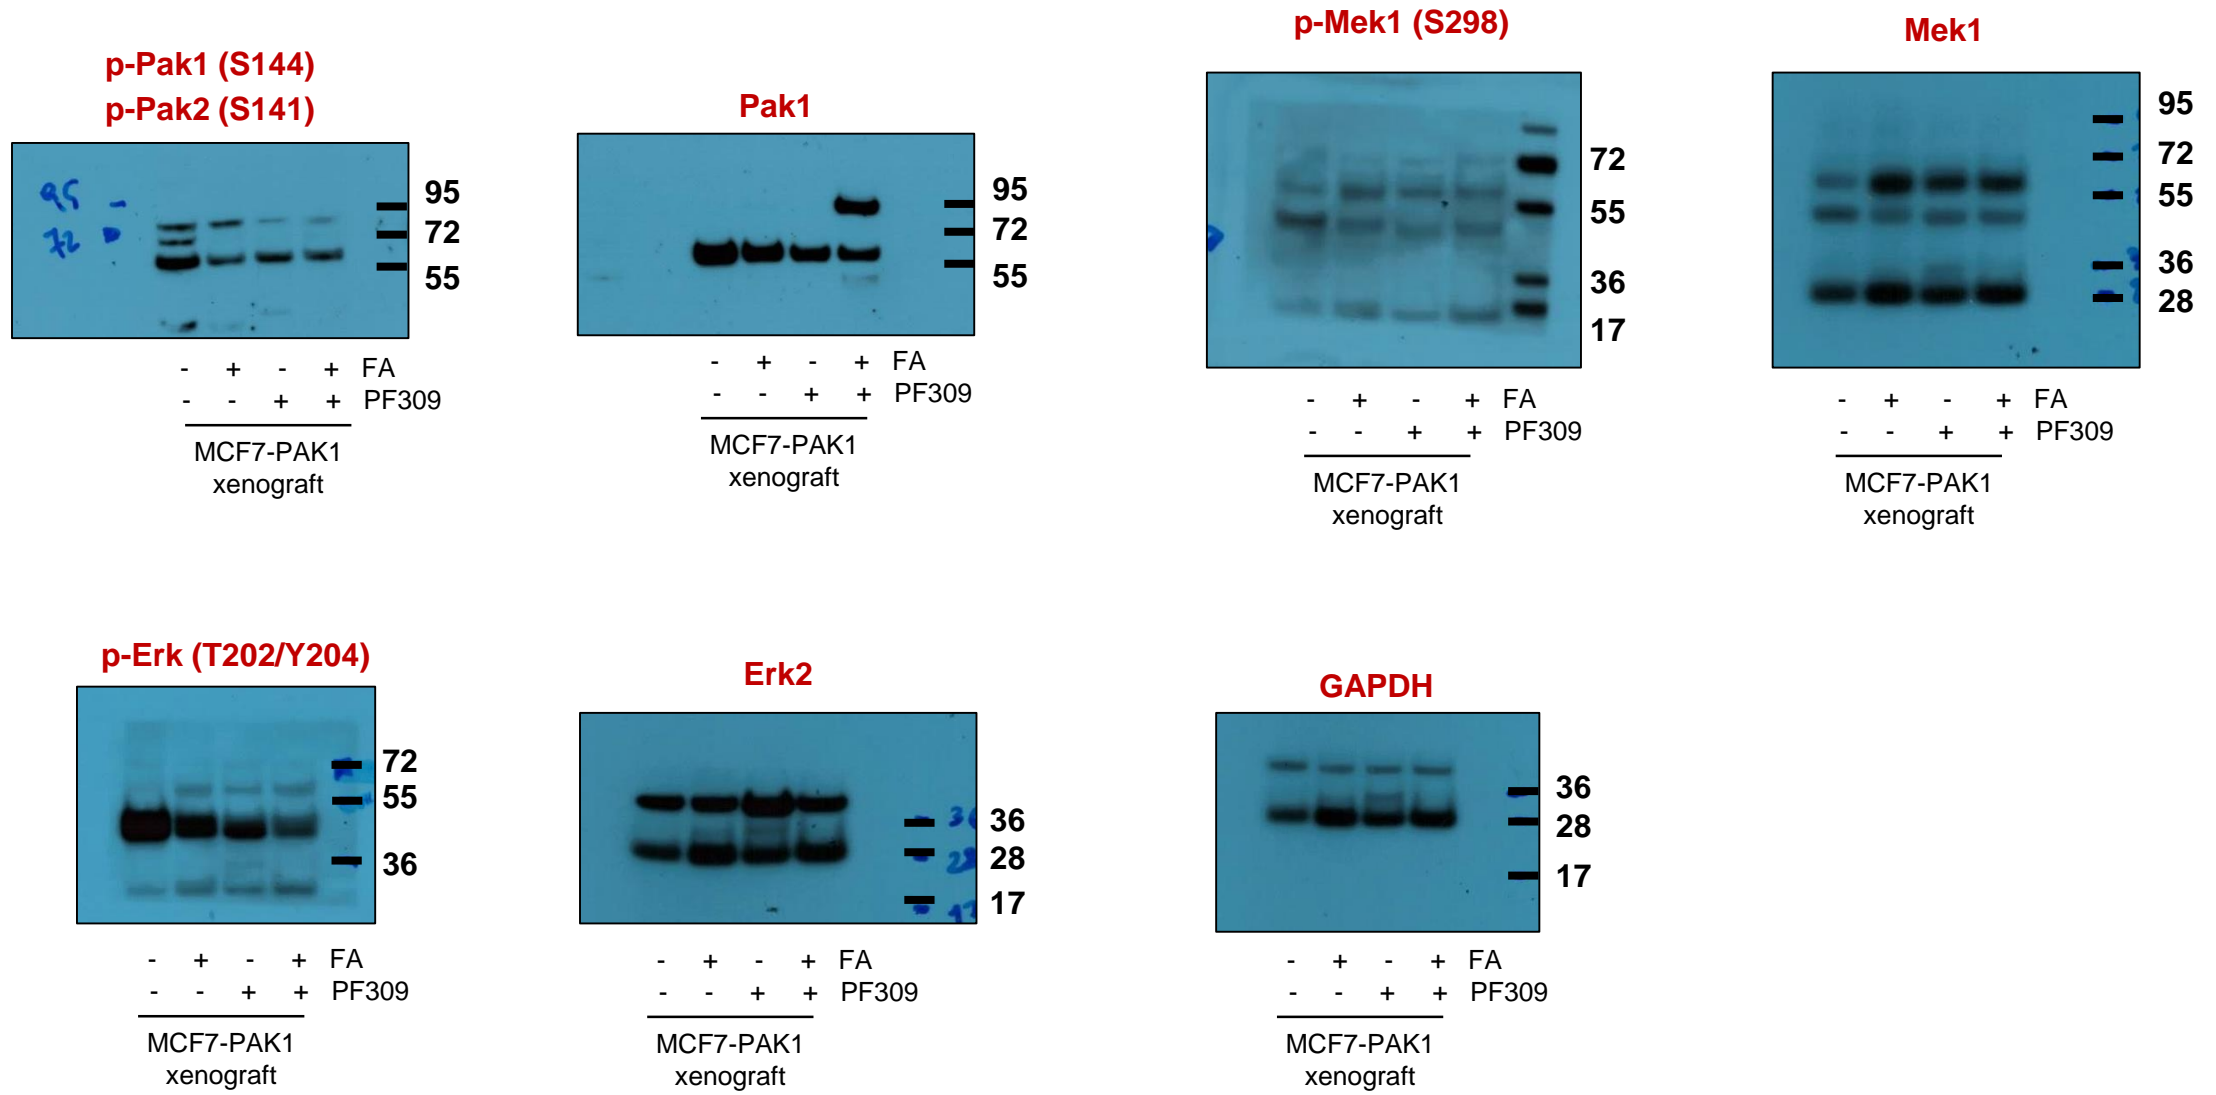

# Supplementary Figure 1

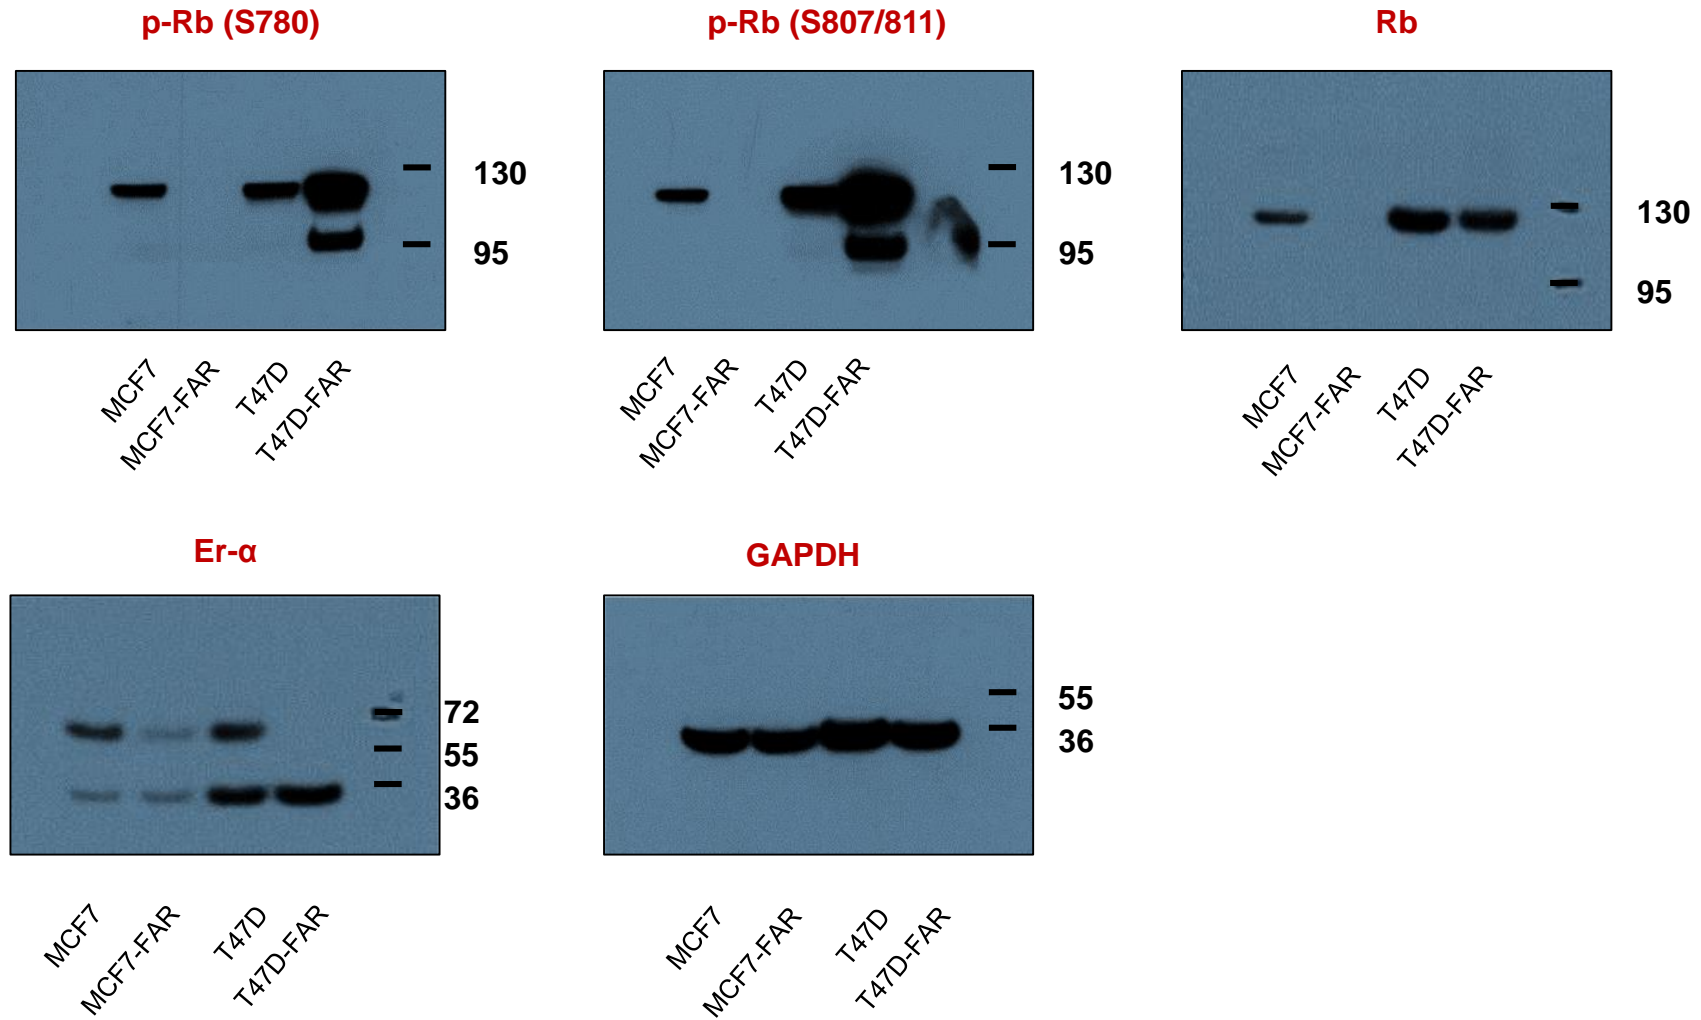

# Supplementary Figure 6

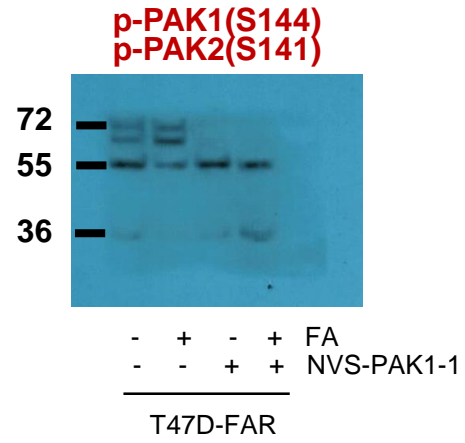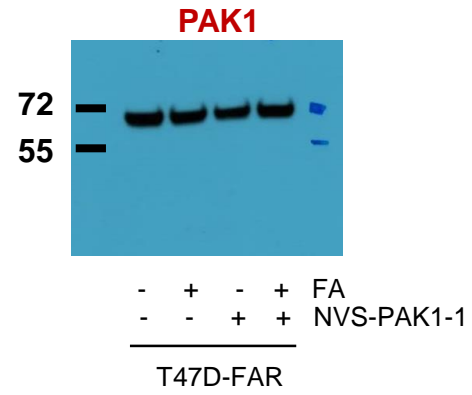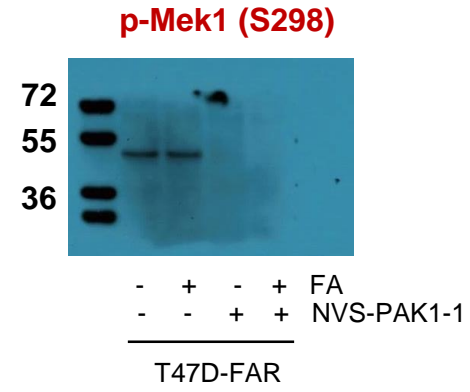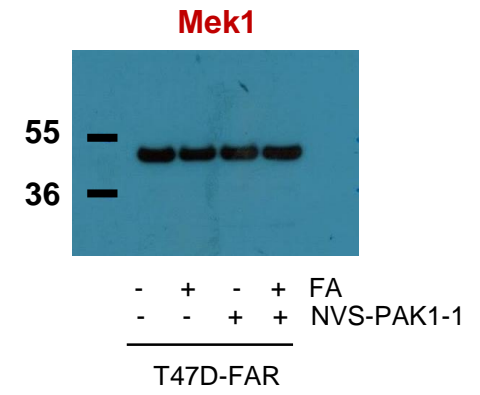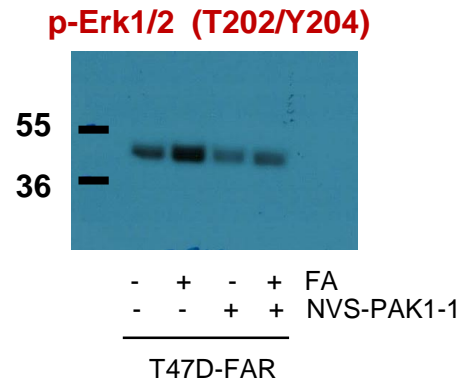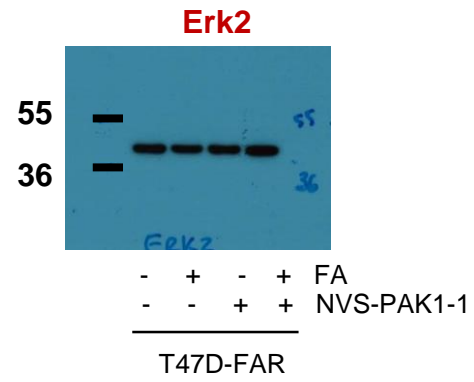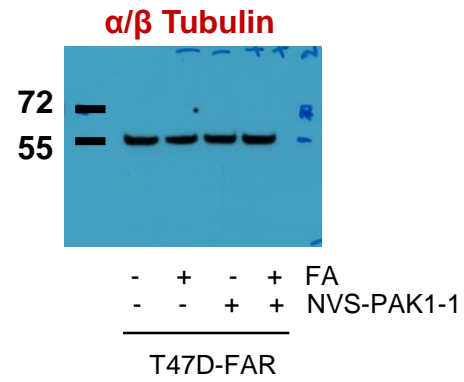

# Supplementary Figure 6

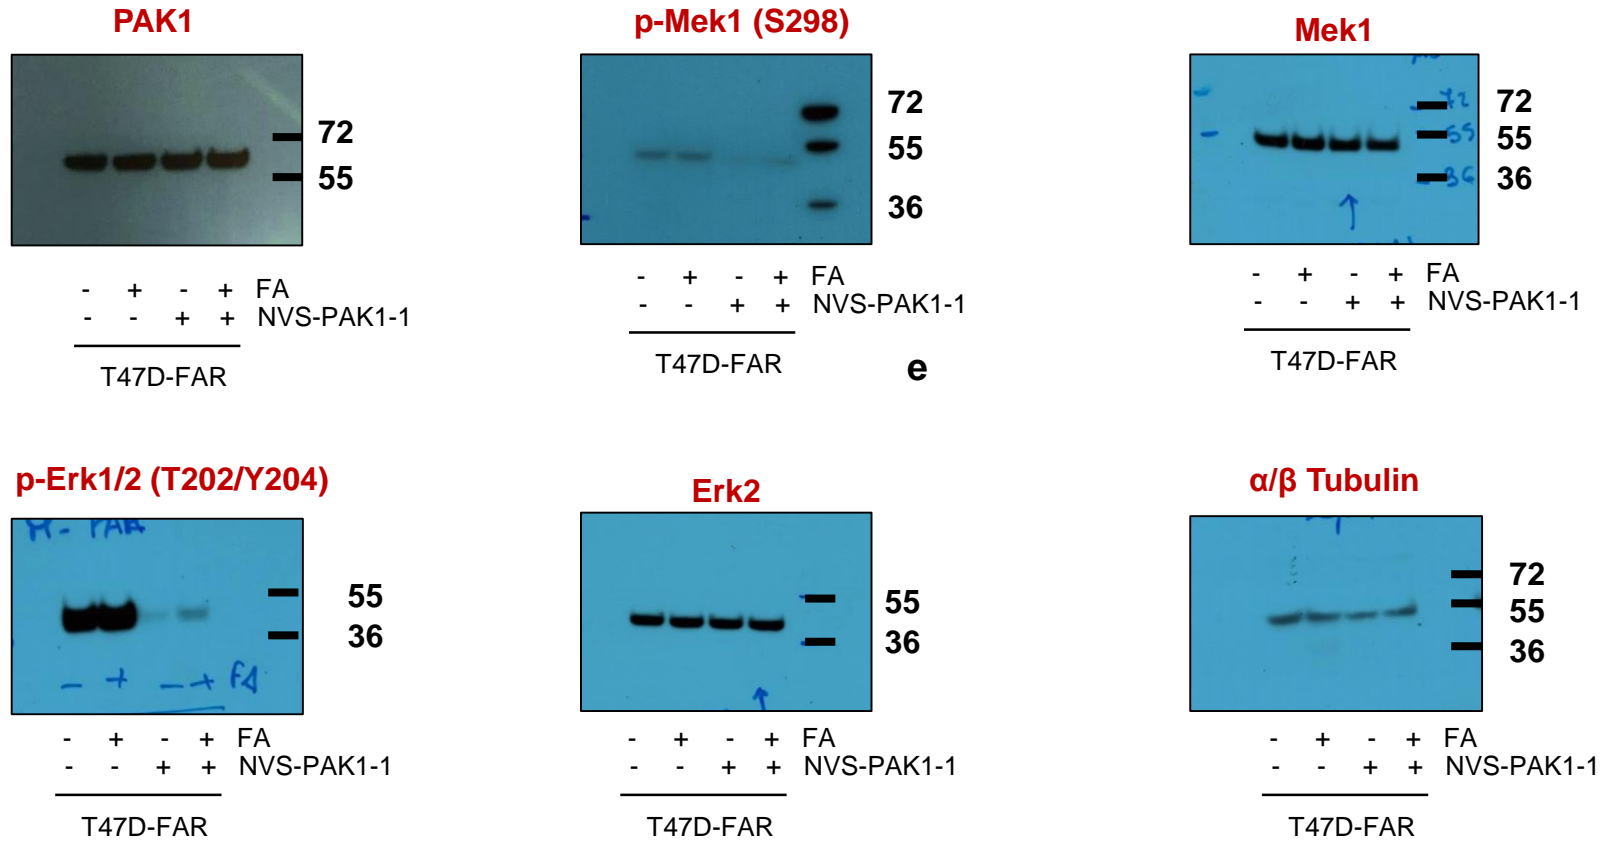

Supplement: 41523_2023_556_MOESM1_ESM.pdf [file 41523_2023_556_MOESM1_ESM.pdf]
